# Supplementary material for: Tuning the structure and catalytic activity of Ru nanoparticle catalysts by single 3d transition-metal atoms in Ru12–metalloporphyrin precursors
Source: Royal Society of Chemistry journal article supplement (doi:10.1039/c7cc09862f), 2018-01-01
Supplement: c7cc09862f1.pdf [file c7cc09862f1.pdf]

## Electronic Supplementary Information

### **Tuning the structure and catalytic activity of Ru nanoparticle catalysts by single 3d transition-metal atoms in Ru<sub>12</sub>-metalloporphyrin precursors**

Satoshi Muratsugu,<sup>\*a</sup> Atsuki Yamaguchi,<sup>a</sup> Gen-ichi Yokota,<sup>a</sup> Tomoaki Maeno,<sup>a</sup> and Mizuki Tada<sup>\*a,b</sup>

<sup>a</sup>Department of Chemistry, Graduate School of Science, Nagoya University, Furo-cho, Chikusa-ku, Nagoya, Aichi 464-8602, Japan.

<sup>b</sup>Research Center for Materials Science (RCMS) & Integrated Research Consortium on Chemical Science (IRCCS), Nagoya University, Furo-cho, Chikusa-ku, Nagoya, Aichi 464-8602, Japan.

## Experimental Section

### Materials and instruments

All chemicals were purchased from commercial sources (Wako Chemicals, Kishida Chemicals, Tokyo Chemical Industry, Sigma-Aldrich, Shin-Etsu Chemical, and Strem Chemicals) and used without further purification unless otherwise noted. Deuterated solvents were purchased from Cambridge Isotope Laboratories and used as received. SiO<sub>2</sub> (Aerosil 300, 300 m<sup>2</sup>/g) was supplied by Nippon Aerosil Co. Ltd. The trinuclear ruthenium complex ([Ru<sub>3</sub>(μ<sub>3</sub>-O)(μ-CH<sub>3</sub>CO<sub>2</sub>)<sub>6</sub>(C<sub>6</sub>H<sub>5</sub>N)<sub>2</sub>(CH<sub>3</sub>OH)](PF<sub>6</sub>)) was synthesized according to a procedure in the literature.<sup>1</sup>

The <sup>1</sup>H and <sup>13</sup>C solution-state NMR spectra were measured at 293 K on an ECA600 spectrometer (JEOL) operating at 600 MHz. Me<sub>4</sub>Si was used as the internal standard when chloroform-*d* was used as the solvent, and the residual solvent peaks were used as the internal standard for other deuterated solvents (1.96 ppm for acetonitrile-*d*<sub>3</sub> and 5.32 ppm for dichloromethane-*d*<sub>2</sub>). ESI-TOF MS spectra were recorded on JMS-T100CS (JEOL) and LCT Premier XE (Waters) systems. MALDI-TOF MS spectra were recorded on AXIMA-CFR Plus (Shimadzu) and Ultraflex III (Bruker Daltonics) systems. 2-(4-Hydroxyphenylazo)benzoic acid (HABA) was used as a matrix, and insulin chain B oxidized was used as a control sample. UV/vis spectra were measured on a V-550 spectrometer (JASCO). The concentration of the sample solutions was 2.0 × 10<sup>-6</sup> mol L<sup>-1</sup> in dichloromethane.

### Synthesis of copper 5,10,15,20-tetrakis(4-pyridyl)porphyrin<sup>2,3</sup>

Copper(II) acetate (0.31 g, 1.7 × 10<sup>-3</sup> mol) was added to a suspension of 5,10,15,20-tetra(4-pyridyl)porphyrin (0.40 g, 6.5 × 10<sup>-4</sup> mol) in a mixed solvent of *N,N*-dimethylformamide (DMF) (12 mL) and acetic acid (12 mL), and the mixture was refluxed for 48 h. The suspension was filtered, and the red-purple precipitate was washed with water and acetone and then extracted with 2,2,2-trifluoroethanol. The solvent was evaporated, the solid was triturated with acetone, and the red-purple solid was collected and dried under vacuum. Yield: 0.39 g (5.7 × 10<sup>-4</sup> mol, 88%). <sup>1</sup>H NMR (600 MHz, chloroform-*d*/methanol-*d*<sub>4</sub> = 95/5 (v/v), ppm): δ 8.79 (s), 7.62 (s).

### Synthesis of nickel 5,10,15,20-tetrakis(4-pyridyl)porphyrin<sup>2,3,4</sup>

Nickel(II) acetate tetrahydrate (0.21 g, 8.5 × 10<sup>-4</sup> mol) was added to a suspension of 5,10,15,20-tetra(4-pyridyl)porphyrin (0.20 g, 3.3 × 10<sup>-4</sup> mol) in a mixed solvent of DMF (12 mL) and acetic acid (12 mL), and the mixture was refluxed for 48 h. The suspension was filtered and the red-purple precipitate was washed with water and acetone and then dried under vacuum. Yield: 0.20 g (2.9 × 10<sup>-4</sup> mol, 89%). <sup>1</sup>H NMR (600 MHz, chloroform-*d*/methanol-*d*<sub>4</sub> = 95/5 (v/v), ppm): δ 8.95 (d, 8H), 8.75 (s, 8H), 8.00 (d, 8H).

### Synthesis of zinc 5,10,15,20-tetrakis(4-pyridyl)porphyrin<sup>2,3,5</sup>

Zinc(II) acetate (0.37 g, 2.0 × 10<sup>-3</sup> mol) was added to a suspension of 5,10,15,20-tetra(4-pyridyl)porphyrin (0.20 g, 3.3 × 10<sup>-4</sup> mol) in DMF (10 mL), and the mixture was refluxed for 48 h. The suspension was filtered, and the purple precipitate was washed with water and acetone and then dried under vacuum. Yield: 0.21 g (3.1 × 10<sup>-4</sup> mol, 95%). <sup>1</sup>H NMR (600 MHz, chloroform-*d*/methanol-*d*<sub>4</sub> = 95/5 (v/v), ppm): δ 8.52 (s, 8H), 8.00–7.31 (s, 16H).

## Synthesis of Ru<sub>12</sub>M complexes (1-Ru<sub>12</sub>M, M = Cu, Ni, Zn) and monometallic Ru<sub>12</sub> complex (1-Ru<sub>12</sub>)

Metal (copper, nickel, or zinc) 5,10,15,20-tetrakis(4-pyridyl)porphyrin/5,10,15,20-tetrakis(4-pyridyl)-21*H*,23*H*-porphine ( $4.0 \times 10^{-5}$  mol) was added to a solution of [Ru<sub>3</sub>(μ<sub>3</sub>-O)(μ-CH<sub>3</sub>CO<sub>2</sub>)<sub>6</sub>(C<sub>6</sub>H<sub>5</sub>N)<sub>2</sub>(CH<sub>3</sub>OH)](PF<sub>6</sub>) (0.16 g,  $1.6 \times 10^{-4}$  mol) in 2,2,2-trifluoroethanol (10 mL), and the resulting mixtures were stirred at room temperature for 19–20 h. Subsequently, the solutions were filtered and the collected dark green filtrates were reduced to about one-third of the original volume by rotary evaporation. The dark green powders were precipitated with diethyl ether (20–30 mL), filtered, and dried under vacuum. The obtained samples are denoted here as **1-Ru<sub>12</sub>M** (M = Cu, Ni, Zn) and **1-Ru<sub>12</sub>**.

**1-Ru<sub>12</sub>Cu**: Yield: 0.126 g ( $2.7 \times 10^{-5}$  mol, 69%). <sup>1</sup>H NMR (600 MHz, acetonitrile-*d*<sub>3</sub>, ppm): δ = 6.43 (t), 6.00 (s), 5.65 (s), 4.82 (s), 4.60 (s), 0.69 (t), 0.14 (s). ESI-TOF MS (positive, methanol/dichloromethane = 1/1, Fig. D): *m/z*: 1002.09 [M-4PF<sub>6</sub>]<sup>4+</sup> (calc. for C<sub>128</sub>H<sub>136</sub>N<sub>16</sub>O<sub>52</sub>CuRu<sub>12</sub>: 1001.91).

**1-Ru<sub>12</sub>Ni**: Yield: 0.143 g ( $3.1 \times 10^{-5}$  mol, 80%). <sup>1</sup>H NMR (600 MHz, acetonitrile-*d*<sub>3</sub>, ppm): δ = 7.46 (s, 8H), 6.41 (t, 8H), 6.01 (s, 8H), 5.60 (s, 16H), 4.88–4.69 (s, s, 36H), 0.66 (s, 8H), 0.00 (s, 16H). ESI-TOF MS (positive, methanol/dichloromethane = 1/1, Fig. D): *m/z*: 1001.09 [M-4PF<sub>6</sub>]<sup>4+</sup> (calc. for C<sub>128</sub>H<sub>136</sub>N<sub>16</sub>O<sub>52</sub>NiRu<sub>12</sub>: 1000.66).

**1-Ru<sub>12</sub>Zn**<sup>6</sup>: Yield: 0.168 g ( $3.7 \times 10^{-5}$  mol, 92%). <sup>1</sup>H NMR (600 MHz, acetonitrile-*d*<sub>3</sub>, ppm): δ = 7.59 (s, 8H), 6.43 (t, 8H), 6.26 (s, 8H), 5.67 (s, 16H), 4.84–4.75 (s, s, 72H), 0.76 (s, 8H), 0.10 (s, 16H). ESI-TOF MS (positive, methanol/dichloromethane = 1/1, Fig. D): *m/z*: 1002.83 [M-4PF<sub>6</sub>]<sup>4+</sup> (calc. for C<sub>128</sub>H<sub>136</sub>N<sub>16</sub>O<sub>52</sub>ZnRu<sub>12</sub>: 1002.41).

**1-Ru<sub>12</sub>**: Yield: 0.157 g ( $3.5 \times 10^{-5}$  mol, 86%). <sup>1</sup>H NMR (600 MHz, acetonitrile-*d*<sub>3</sub>, ppm): δ = 7.59 (s, 8H), 6.43 (t, 8H), 6.26 (s, 8H), 5.67 (s, 16H), 4.84–4.75 (s, s, 72H), 0.76 (s, 8H), 0.10 (s, 16H). ESI-TOF MS (positive, methanol/dichloromethane = 1/1): *m/z*: 986.14 [M-4PF<sub>6</sub>]<sup>4+</sup> (calc. for C<sub>128</sub>H<sub>136</sub>N<sub>16</sub>O<sub>52</sub>Ru<sub>12</sub>: 986.43).

## Synthesis of copper 5,10,15,20-tetraphenylporphyrin<sup>7</sup>

Copper(II) acetate monohydrate (0.0793 g,  $4.0 \times 10^{-4}$  mol) was added to a solution of 5,10,15,20-tetraphenylporphyrin (0.243 g,  $4.0 \times 10^{-4}$  mol) in a mixed solvent of methanol (12 mL) and toluene (40 mL), and the mixture was refluxed for 4 h. The suspension was filtered, and the red-purple precipitate was washed with methanol and toluene and then dried under vacuum. Yield: 0.151 g ( $2.2 \times 10^{-4}$  mol, 56%). <sup>1</sup>H NMR (600 MHz, chloroform-*d*, ppm): δ 7.65 (br), 7.49 (br). MALDI-TOF MS (positive, HABA): *m/z*: 675.80 [M]<sup>+</sup> (calc. for C<sub>44</sub>H<sub>28</sub>CuN<sub>4</sub>: 676.28).

### Preparation of 4-pyridylethyltriethoxysilane-functionalized SiO<sub>2</sub> (A)<sup>8</sup>

SiO<sub>2</sub> (Aerosil 300, 6.0 g, 300 m<sup>2</sup>/g) was calcined at 673 K for 2 h and then maintained under vacuum while cooling. The precalcined SiO<sub>2</sub> was suspended in dry toluene (120 mL) under an N<sub>2</sub> atmosphere, and a dry toluene solution (10 mL) of 4-pyridylethyltriethoxysilane (Py-et-Si(OEt)<sub>3</sub>; 0.30 mL, 1.1 × 10<sup>-3</sup> mol, to give a surface density of 0.30 nm<sup>-2</sup> of Py groups on the SiO<sub>2</sub> surface when assuming 100% grafting) was added. This suspension was refluxed for 24 h. After cooling to room temperature, the resulting gel was collected in a thimble filter tube inside a Schlenk flask and washed with toluene, followed by washing with toluene in a Soxhlet extractor for about 22 h and then with hexane for about 16 h under N<sub>2</sub>. Finally, the gel was dried under vacuum. The obtained sample is denoted here as **A**. The actual average surface density of Py groups was estimated to be 0.27 nm<sup>-2</sup> from the N content determined by elemental analysis (N: 0.18%).

### Preparation of **B-Ru<sub>12</sub>M**, **B-Ru<sub>12</sub>**, and **B-Cu**: Attachment of **1-Ru<sub>12</sub>M** to **A**

Under an N<sub>2</sub> atmosphere, solutions of **1-Ru<sub>12</sub>M** (M = Cu, Ni, Zn) (0.090 g, 2.0 × 10<sup>-5</sup> mol), **1-Ru<sub>12</sub>** (0.090 g, 2.0 × 10<sup>-5</sup> mol), or **1-Cu** (0.013 g, 2.0 × 10<sup>-5</sup> mol) in dry degassed dichloromethane (10 mL) were added to suspensions of **A** (2 g, average surface density of pyridine moiety: 0.27 nm<sup>-2</sup>) in dry degassed dichloromethane (18 mL). The suspensions were stirred at 298 K for 1 h. Subsequently, the mixtures were dried under vacuum to afford green solids, which are denoted here as **B-Ru<sub>12</sub>M**, **B-Ru<sub>12</sub>**, and **B-Cu** respectively. The loading of each metal was estimated by X-ray fluorescence (XRF) spectroscopy.

The surface density of **1-Ru<sub>12</sub>M** on **B** was estimated using the following equation.

$$\text{The surface density of } \mathbf{1-Ru_{12}M} = \frac{\text{The number of } \mathbf{1-Ru_{12}M} (6 \times 10^{18} / 1 \text{ g of SiO}_2)}{\text{The surface area of SiO}_2 (300 \text{ m}^2/\text{g})}$$

### Preparation of **C-Ru<sub>12</sub>M**, **C-Ru<sub>12</sub>**, and **C-Cu**<sup>9</sup>

Tetramethoxysilane (Si(OCH<sub>3</sub>)<sub>4</sub>, TMOS) (2.5 mL) and distilled H<sub>2</sub>O (1.2 g) were placed in two glass reactors (made by glass tubes) connected to a two-necked flask containing **B-Ru<sub>12</sub>M**, **B-Ru<sub>12</sub>**, or **B-Cu** (1.5 g). Ribbon heaters and thermal insulators were wrapped on the two glass reactors and the connected glass tube. After the whole system was evacuated to prepare a closed system with reduced pressure (ca. 1 Pa) for 0.5 h, the glass reactors were heated to 383 K and chemical vapor deposition (CVD) was utilized to vaporize TMOS and H<sub>2</sub>O and deposit them on **B-Ru<sub>12</sub>M**, **B-Ru<sub>12</sub>**, or **B-Cu**. During the CVD process, **B-Ru<sub>12</sub>M**, **B-Ru<sub>12</sub>**, or **B-Cu** in the two-necked flask was vigorously stirred at room temperature. Then, the two-necked flask was separated while maintaining the closed system, and hydrolysis–polymerization of TMOS was performed at 353 K for 24 h in an oven. The whole closed system was subsequently evacuated at 373 K for 3 h. The obtained samples are denoted here as **C-Ru<sub>12</sub>M**, **C-Ru<sub>12</sub>**, and **C-Cu**. The loading of each metal was estimated by XRF.

The amount of SiO<sub>2</sub> matrix overlayers was estimated to be the weight gain after the preparation process of **C**-series, and the average weight gain was 1.0 g. The structure of SiO<sub>2</sub> matrix overlayers was assumed to be quartz (density = 2.2 g cm<sup>-3</sup>) to calculate the average height of SiO<sub>2</sub> matrix overlayres, although the actual structure of SiO<sub>2</sub> matrix overlayers is amorphous. From these data, the average height of SiO<sub>2</sub> matrix overlayres was estimated to be 1 nm.<sup>9</sup>

### Preparation of **D-RuM**, **D-Ru**, and **D-Cu**

**C-Ru<sub>12</sub>M**, **C-Ru<sub>12</sub>**, or **C-Cu** was placed in a glass flow cell, which was then attached to a vacuum line. After evacuating the cell (ca.  $10^{-2}$  Pa), it was heated to 873 K and held at that temperature for 2 h. Subsequently, H<sub>2</sub> (6.7 kPa) was passed through the cell for 1 h at 873 K. The obtained black solids are denoted here as **D-RuM**, **D-Ru**, and **D-Cu**. The loading of each metal was estimated by XRF.

## Catalyst characterization

**XRF:** XRF was measured on a JSX-1000S spectrometer (JEOL) operating at room temperature. The loadings of Ru, Cu, Ni, and Zn were estimated from the Ru/Si, Cu/Si, Ni/Si, and Zn/Si peak intensity ratios, respectively, using standard curves based on the Ru K $\alpha$ , Cu K $\alpha$ , Ni K $\alpha$ , Zn K $\alpha$ , and Si K $\alpha$  fluorescence X-rays (the net counts were used). The samples were thoroughly ground using a mortar and pestle, and 20 mg samples were pressed (1 MPa) into pellet disks for the measurements. The samples used for generating the standard curves for Ru/Si, Cu/Si, Ni/Si, and Zn/Si were prepared by the impregnation of SiO<sub>2</sub> (Aerosil 300) with di- $\mu$ -chlorobis[(*p*-cymene)chlororuthenium], bis(2,4-pentanedionato)copper, [1,2-bis(diphenylphosphino)ethane]dichloronickel, and bis(2,4-pentanedionato)zinc using dichloromethane.

**UV/vis spectroscopy:** Diffuse reflectance (DR) UV/vis spectra of solid samples were measured on a V-550 spectrometer (JASCO). Each solid sample was enclosed in a quartz cell under Ar and the DR-UV/vis spectra were recorded using an integrating sphere.

**Elemental analysis:** Organic residues on the solid samples were analyzed by elemental analysis (Microorganic Element Analyzer CHN Corder MT-6, Yanako). The surface loadings of the pyridine ligand and metal complexes were estimated from the value of N wt %.

**Powder X-ray diffraction (XRD):** Powder XRD patterns with a wide angle range (3–90°) were recorded at a scan rate of 2° min<sup>-1</sup> using a MultiFlex X-ray diffractometer (Rigaku; Cu K $\alpha$ ,  $\lambda$  = 1.5418 Å, 40 kV, 30 mA), and those with a narrow angle range (30–48°) were measured at a scan rate of 3.4° min<sup>-1</sup> using an Empyrean X-ray diffractometer (PANalytical; Cu K $\alpha$ ,  $\lambda$  = 1.5418 Å, 45 kV, 40 mA).

**X-ray photoelectron spectroscopy (XPS):** XPS was measured on an ECSA3057 system (ULVAC-PHI) at a base pressure of 1 × 10<sup>-7</sup> Pa. The X-ray source and power were Al K $\alpha$  (1486.7 eV) and 350 W, respectively. Narrow multiplex scans were recorded with a pass energy of 11.75 eV and a step size of 0.1 eV. A charge neutralization function was employed to compensate for the charge buildup on the solid samples due to X-ray irradiation. The samples were ground and pressed into pellet disks (10 mg pressed at 2–5 MPa), which were attached to the cell holder using carbon tape. Background subtraction was performed according to the Shirley method using the Origin software (version 8), and each peak was curve fitted using Gaussian waves. The binding energies were referenced to Si 2p at 103.4 eV and the peak intensities were normalized using the peak areas from the Si 2p XPS spectra.

**X-ray absorption fine structure (XAFS):** XAFS spectra at the Ru K-edge were measured in the transmission mode at the NW10A station of the Photon Factory at KEK-IMSS (Tsukuba, Japan). The energy and current of the electrons in the storage ring were 6.5 GeV and 60 mA, respectively. X-rays from the storage ring were monochromatized using a Si(311) double-crystal monochromator, and ionization chambers filled with pure Ar and Kr gases were used to monitor the incident and transmitted X-rays, respectively. Ru powder mixed with boron nitride and pelletized into a disk (10 mm in diameter) was used as the reference. All of the samples were enclosed in an XAFS cell (4 mm $\phi$ ) sealed with a carbon cap inside a glovebox without exposure to air. All of the samples were measured at 20 K under vacuum.

XAFS spectra at the Cu, Ni, and Zn K-edges were measured in the fluorescence mode at the BL12C station of the Photon Factory at KEK-IMSS (Tsukuba, Japan). The energy and current of the electrons in the storage ring were 6.5 GeV and 60 mA, respectively. X-rays from the storage ring were monochromatized with a

Si(111) double-crystal monochromator. Two ionization chambers filled with pure N<sub>2</sub> gas and a mixture of N<sub>2</sub> and Ar gases (1/1, v/v), and a 19-channel germanium multi-solid-state detector (MSSD) were used to monitor the incident, transmitted, and fluorescence X-rays, respectively. For Ni K-edge, the intensity of incident X-ray was detune to 70% of initial intensity. Inelastically scattered X-rays from Cu, Ni, and Zn were cut off with Ni, Co, and Cu filters ( $\mu t = 6$ ), respectively, and the fluorescence X-rays from each element ( $K_{\alpha}$  line) were selected. All of the samples were enclosed in an XAFS cell (4 mm $\phi$ , 2 mm thickness) sealed with Kapton tape inside a glovebox without exposure to air. All of the samples were measured at 20 K under vacuum.

The XAFS spectra were analyzed using ATHENA and ARTEMIS with IFEFFIT (version 1.2.11).<sup>10</sup> The threshold energy was tentatively set at the inflection point of the Ru K-edge (22118.0 eV), Cu K-edge (8980.0 eV), Ni K-edge (8331.0 eV), or Zn K-edge (9660.7 eV).<sup>11</sup> Background subtraction was performed using the Autobk method and the spline smoothing algorithm in ATHENA.<sup>12</sup> The  $k^3$ -weighted extended XAFS (EXAFS) oscillations were Fourier transformed into  $R$ -space. Curve-fitting analysis was carried out in the  $R$ -space. The fitting parameters for each shell were the coordination number (CN), interatomic distance ( $R$ ), Debye–Waller factor ( $\sigma^2$ : mean-square displacement), and correction-of-edge energy ( $\Delta E_0$ ). The  $\Delta E_0$  and  $\sigma^2$  of Ru–O ( $\mu$ -O), Ru–O (CH<sub>3</sub>COO), Ru–N (py), Ru $\cdots$ C (CH<sub>3</sub>COO, py), and Ru–O in **D**-series were restrained to be the same values in the Ru K-edge EXAFS curve-fitting analyses. The values of  $S_0^2$  were estimated using the EXAFS curve fitting of standard samples, and were fixed for each EXAFS analysis. For the Ru K-edge,  $S_0^2$  was fixed to be 1 (from Ru powder and **1-Ru<sub>12</sub>Cu**). For the Cu K-edge,  $S_0^2$  was fixed to be 0.97 (from **1-Ru<sub>12</sub>Cu**) for the curve fitting of **B-Ru<sub>12</sub>Cu** and **C-Ru<sub>12</sub>Cu** or CuO (0.67) for **D-RuCu**. For the Ni K-edge,  $S_0^2$  was fixed to be 0.73 (from **1-Ru<sub>12</sub>Ni**) for the curve fitting of **B-Ru<sub>12</sub>Ni** and **C-Ru<sub>12</sub>Ni** or NiO (0.92) for **D-RuNi**. For the Zn K-edge,  $S_0^2$  was fixed to be 0.82 (from **1-Ru<sub>12</sub>Zn**) for the curve-fitting of **B-Ru<sub>12</sub>Zn** and **C-Ru<sub>12</sub>Zn** or ZnO (0.92) for **D-RuZn**. The phase shifts and backscattering amplitudes were calculated using the FEFF8<sup>13</sup> code with the structural parameters obtained from the crystal structures of Ru metal, CuO, NiO, ZnO, [Ru<sub>3</sub>( $\mu_3$ -O)( $\mu$ -CH<sub>3</sub>CO<sub>2</sub>)<sub>6</sub>(C<sub>6</sub>H<sub>5</sub>N)<sub>3</sub>](PF<sub>6</sub>)<sup>14</sup>, 5,10,15,20-tetraphenylporphyrin Cu complex,<sup>15</sup> 2,3,7,8,12,13,17,18-octaethylporphinato Ni complex,<sup>16</sup> and 5,15-bis(3,5-di-*t*-butylphenyl)-10,20-diphenylporphinato Zn complex.<sup>17</sup>

**High-angle Annular Dark Field Scanning Transmission Electron Microscopy (HAADF-STEM):** HAADF-STEM images were taken using a JEM-ARM 200F transmission electron microscopes (JEOL with an accelerating voltage of 200 kV High Voltage Electron Microscope Laboratory, Institute of Materials and Systems for Sustainability, Nagoya University, Japan). Samples were directly deposited on an appropriate microgrid (Cu, Mo, Ni) and were blown with an air duster gun to remove excess. Carbon deposition was conducted on the microgrids using a carbon coater in order to minimize the drift of the samples during measurement.

## Catalytic reactions

**Hydrogenation of acetophenone derivatives:** The appropriate catalyst (Ru:  $1.1 \times 10^{-6}$  mol) was transferred into a glass tube inside an Ar-filled glove box, and a solution of acetophenone ( $5.3 \times 10^{-4}$  mol,  $0.18 \text{ mol L}^{-1}$ ) in dry, degassed 1,4-dioxane (3 mL) was added. The glass tube was placed in an autoclave under an  $\text{N}_2$  atmosphere. The system was then purged with  $\text{H}_2$  (0.5 MPa) and leaked to atmospheric pressure. This cycle was repeated ten times to exchange the inner atmosphere of the autoclave to  $\text{H}_2$ . The system was then purged with 2.0 MPa of  $\text{H}_2$ , and the reaction mixture was stirred at 363 K. After the reaction, the  $\text{H}_2$  was leaked and the solid portion of the reaction mixture was removed by filtration. *n*-Dodecane (0.010 mL,  $4.4 \times 10^{-5}$  mol) was added to a sample (0.5 mL) of the solution portion as an internal standard. The molar ratio of Ru to the reactant and the internal standard was maintained at 1:500:250. The reactions were monitored using FID-GC (Shimadzu GC-2014) and GC-MS (Shimadzu GC-MS QP2010) with an InertCap 5 column (GL Science,  $0.25 \mu\text{m (df)} \times 0.25 \text{ mm (I.D.)} \times 30 \text{ m}$ ).

**Heterogeneity test:** The reaction conducted using the above procedure, and the solution phase was separated from the solid part at the point where the conversion of acetophenone was around 20% under  $\text{N}_2$  atmosphere. The solution phase was continued for the reaction and the GC analysis was performed in a similar way.



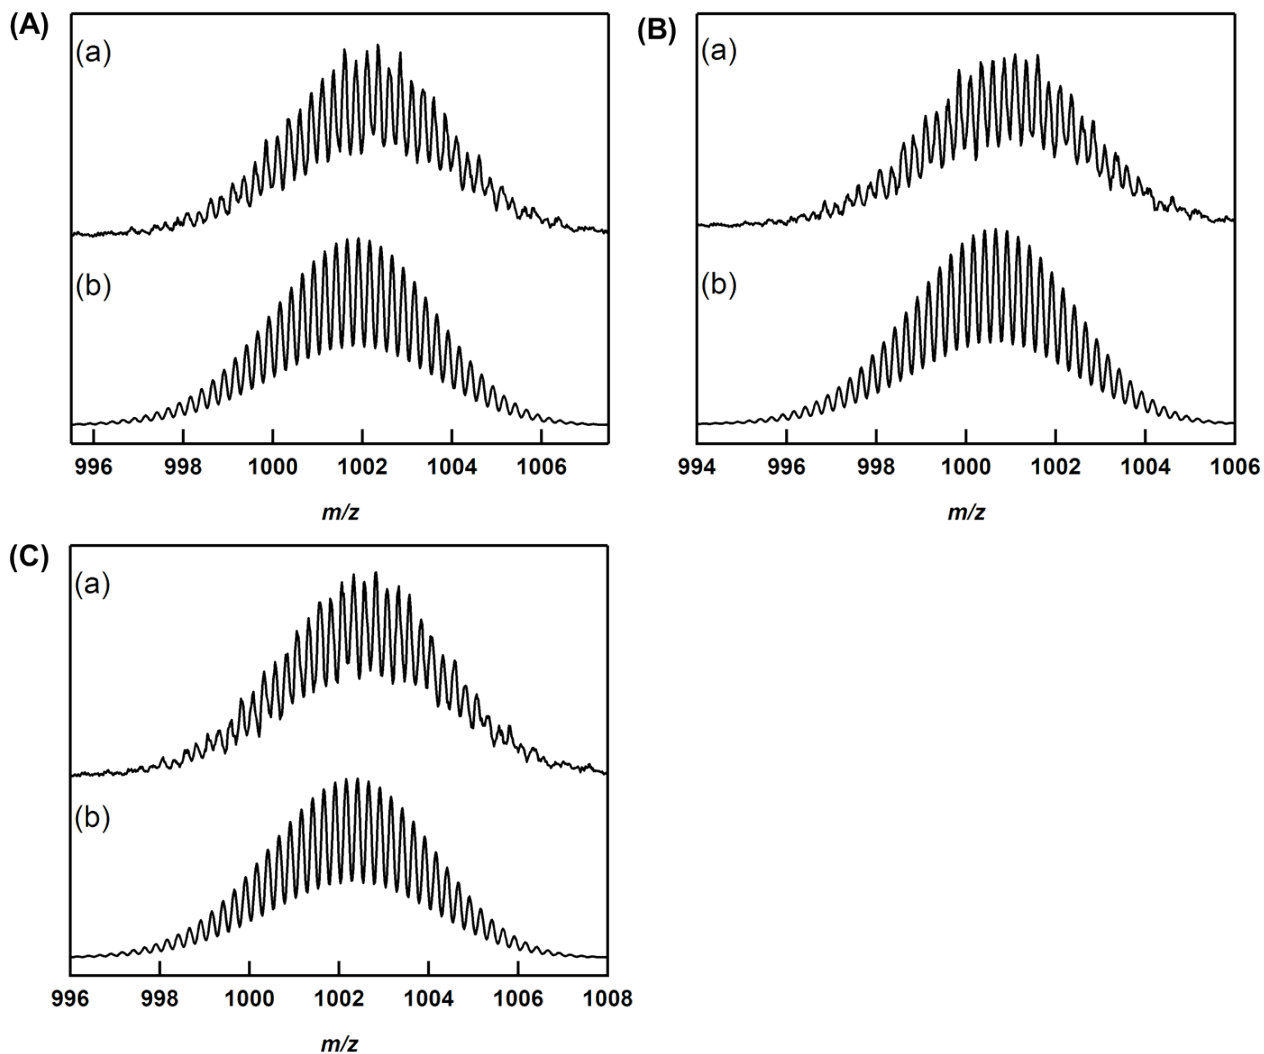

**Fig. I.** ESI-TOF MS spectra of (A) **1-Ru<sub>12</sub>Cu**, (a) an observed spectrum and (b) a simulated spectrum for  $[\text{C}_{128}\text{H}_{136}\text{N}_{16}\text{O}_{52}\text{CuRu}_{12}]^{4+}$ ; (B) **1-Ru<sub>12</sub>Ni**, (a) an observed spectrum and (b) a simulated spectrum for  $[\text{C}_{128}\text{H}_{136}\text{N}_{16}\text{O}_{52}\text{NiRu}_{12}]^{4+}$ ; and (C) **1-Ru<sub>12</sub>Zn**, (a) an observed spectrum and (b) a simulated spectrum for  $[\text{C}_{128}\text{H}_{136}\text{N}_{16}\text{O}_{52}\text{ZnRu}_{12}]^{4+}$ .

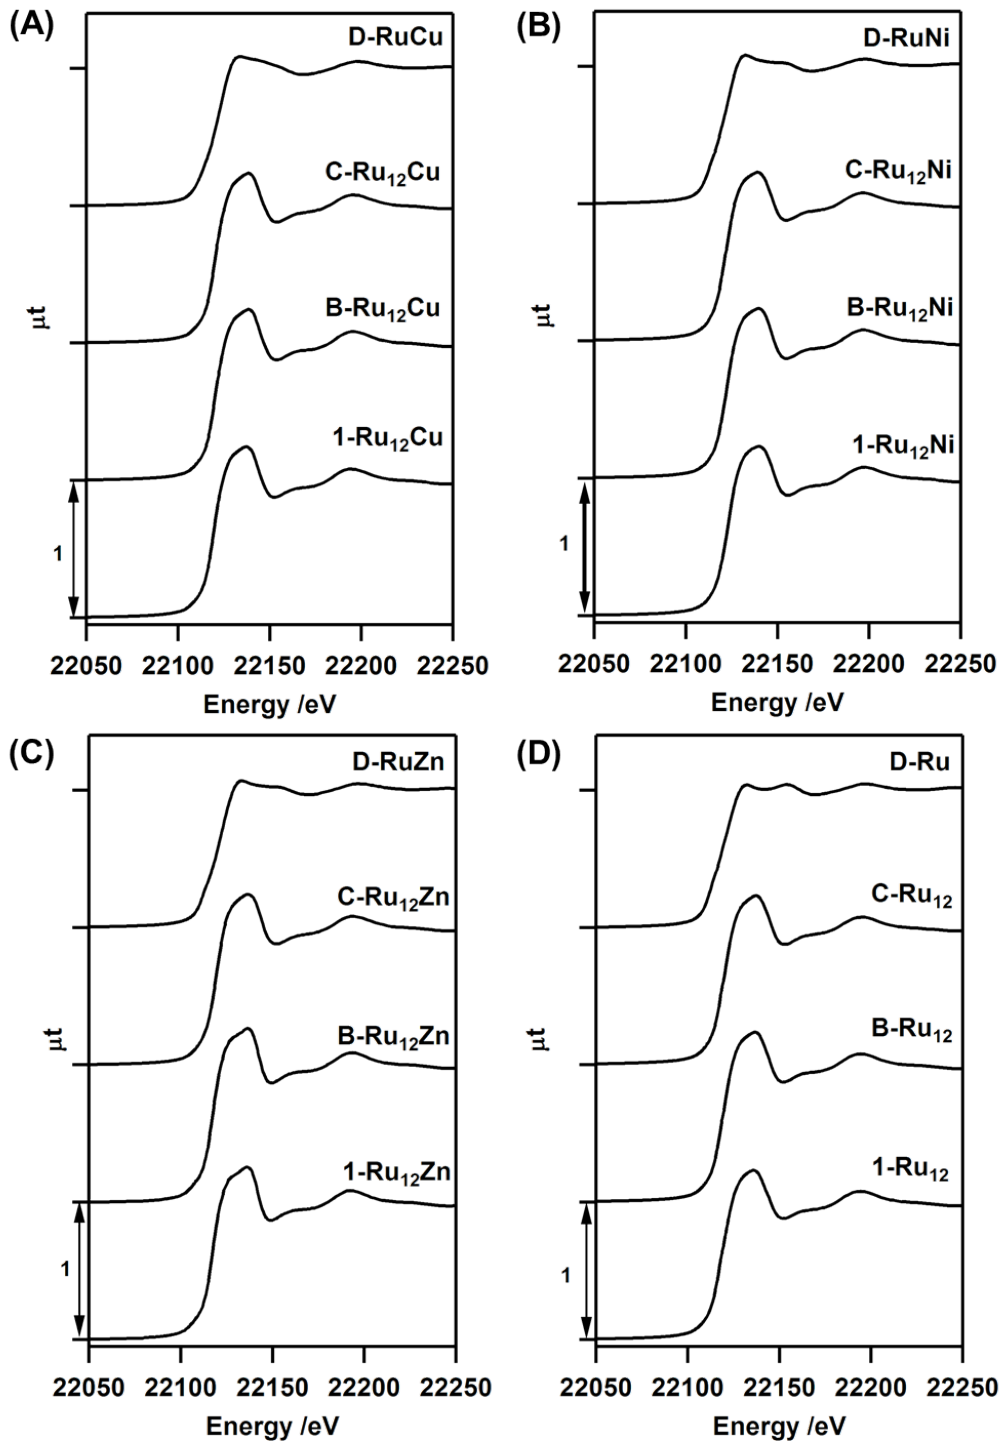

**Fig. S1.** Normalized Ru K-edge XANES spectra of (A) **1-Ru<sub>12</sub>Cu**, **B-Ru<sub>12</sub>Cu**, **C-Ru<sub>12</sub>Cu**, and **D-RuCu**; (B) **1-Ru<sub>12</sub>Ni**, **B-Ru<sub>12</sub>Ni**, **C-Ru<sub>12</sub>Ni**, and **D-RuNi**; (C) **1-Ru<sub>12</sub>Zn**, **B-Ru<sub>12</sub>Zn**, **C-Ru<sub>12</sub>Zn**, and **D-RuZn**; and (D) **1-Ru<sub>12</sub>**, **B-Ru<sub>12</sub>**, **C-Ru<sub>12</sub>**, and **D-Ru**. All of the samples were measured at 20 K.

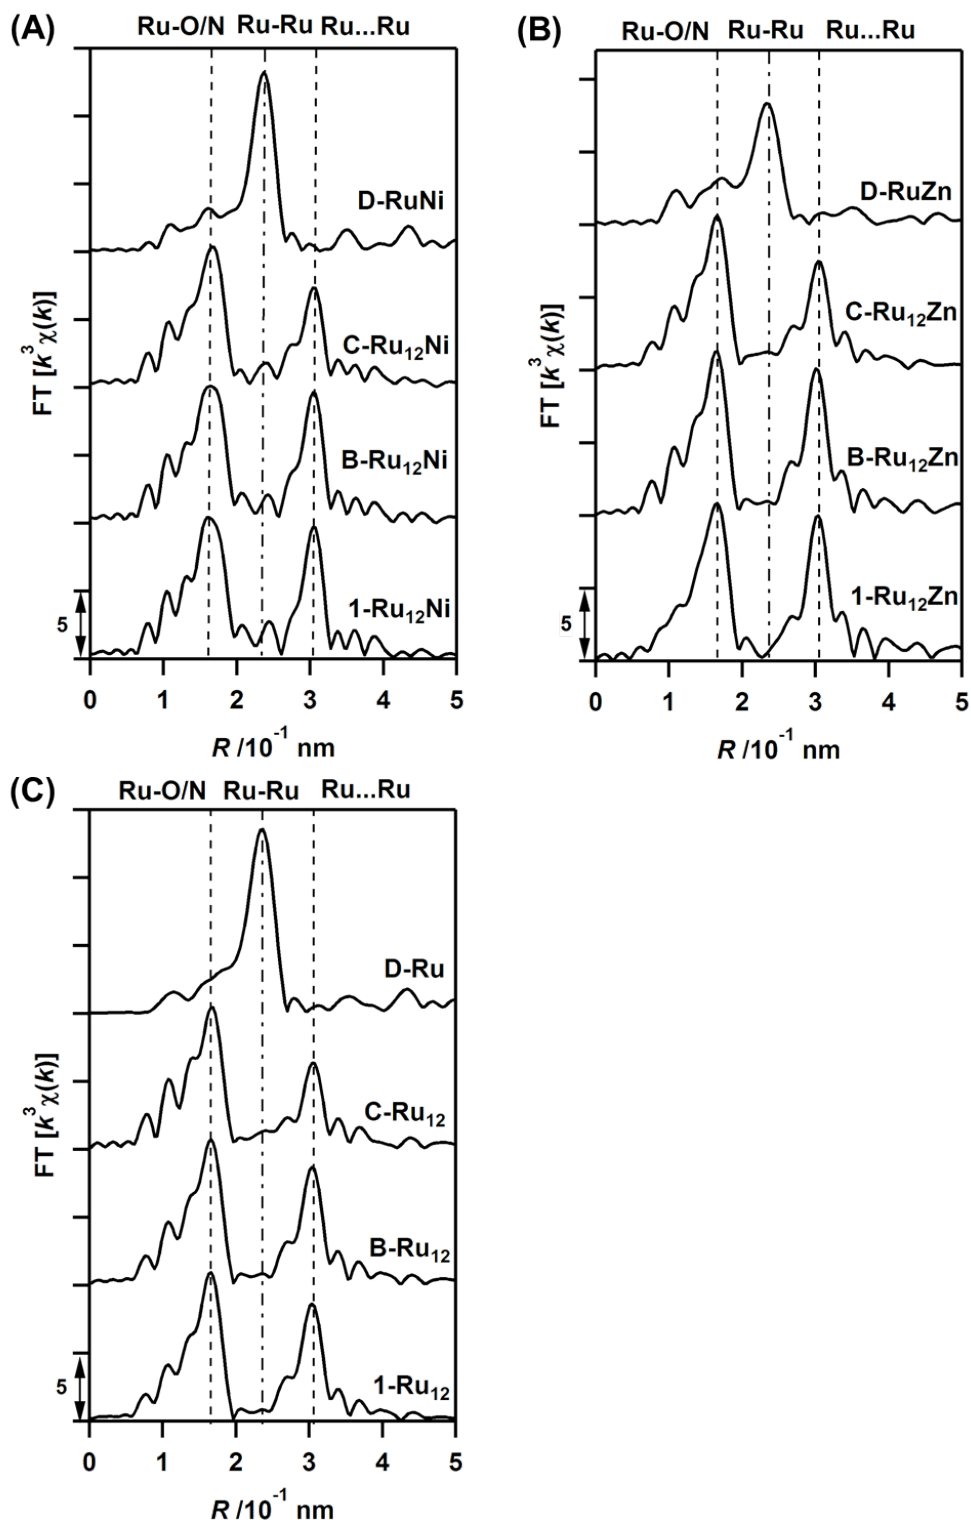

**Fig. S2.**  $k^3$ -Weighted Ru K-edge EXAFS Fourier transforms ( $k = 30\text{--}160 \text{ nm}^{-1}$ ) for (A) **1-Ru<sub>12</sub>Ni**, **B-Ru<sub>12</sub>Ni**, **C-Ru<sub>12</sub>Ni**, and **D-RuNi**; (B) **1-Ru<sub>12</sub>Zn**, **B-Ru<sub>12</sub>Zn**, **C-Ru<sub>12</sub>Zn**, and **D-RuZn**; and **1-Ru<sub>12</sub>**, **B-Ru<sub>12</sub>**, **C-Ru<sub>12</sub>**, and **D-Ru**. All of the samples were measured at 20 K.

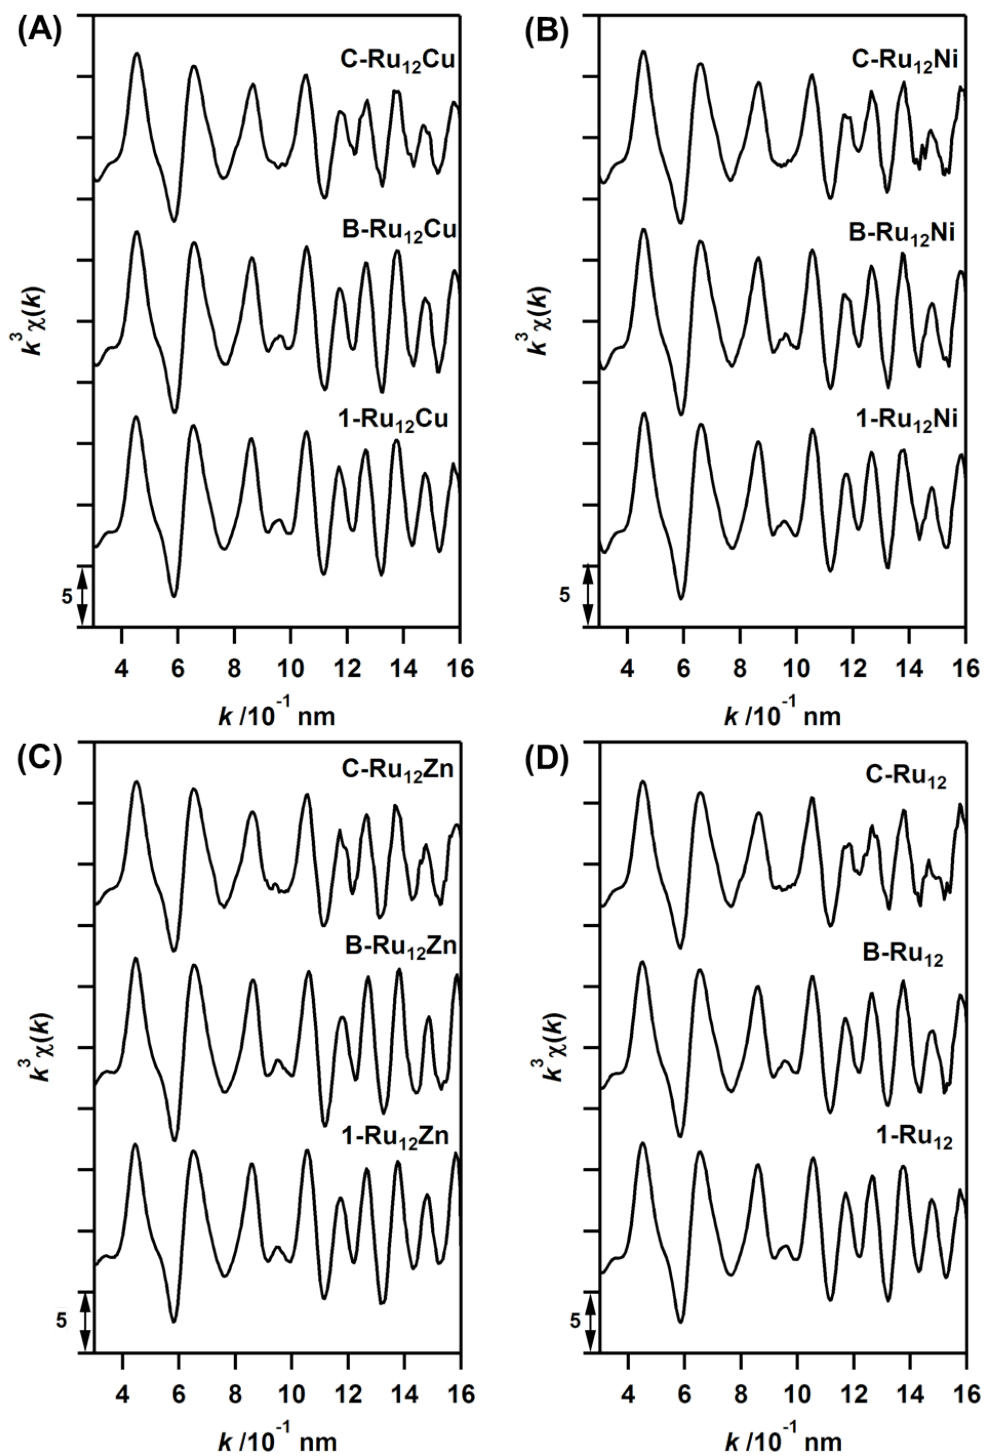

**Fig. S3.**  $k^3$ -Weighted Ru K-edge EXAFS oscillations of (A) **1-Ru<sub>12</sub>Cu**, **B-Ru<sub>12</sub>Cu**, and **C-Ru<sub>12</sub>Cu**; (B) **1-Ru<sub>12</sub>Ni**, **B-Ru<sub>12</sub>Ni**, and **C-Ru<sub>12</sub>Ni**; (C) **1-Ru<sub>12</sub>Zn**, **B-Ru<sub>12</sub>Zn**, and **C-Ru<sub>12</sub>Zn**; and (D) **1-Ru<sub>12</sub>**, **B-Ru<sub>12</sub>**, and **C-Ru<sub>12</sub>**. All of the samples were measured at 20 K.

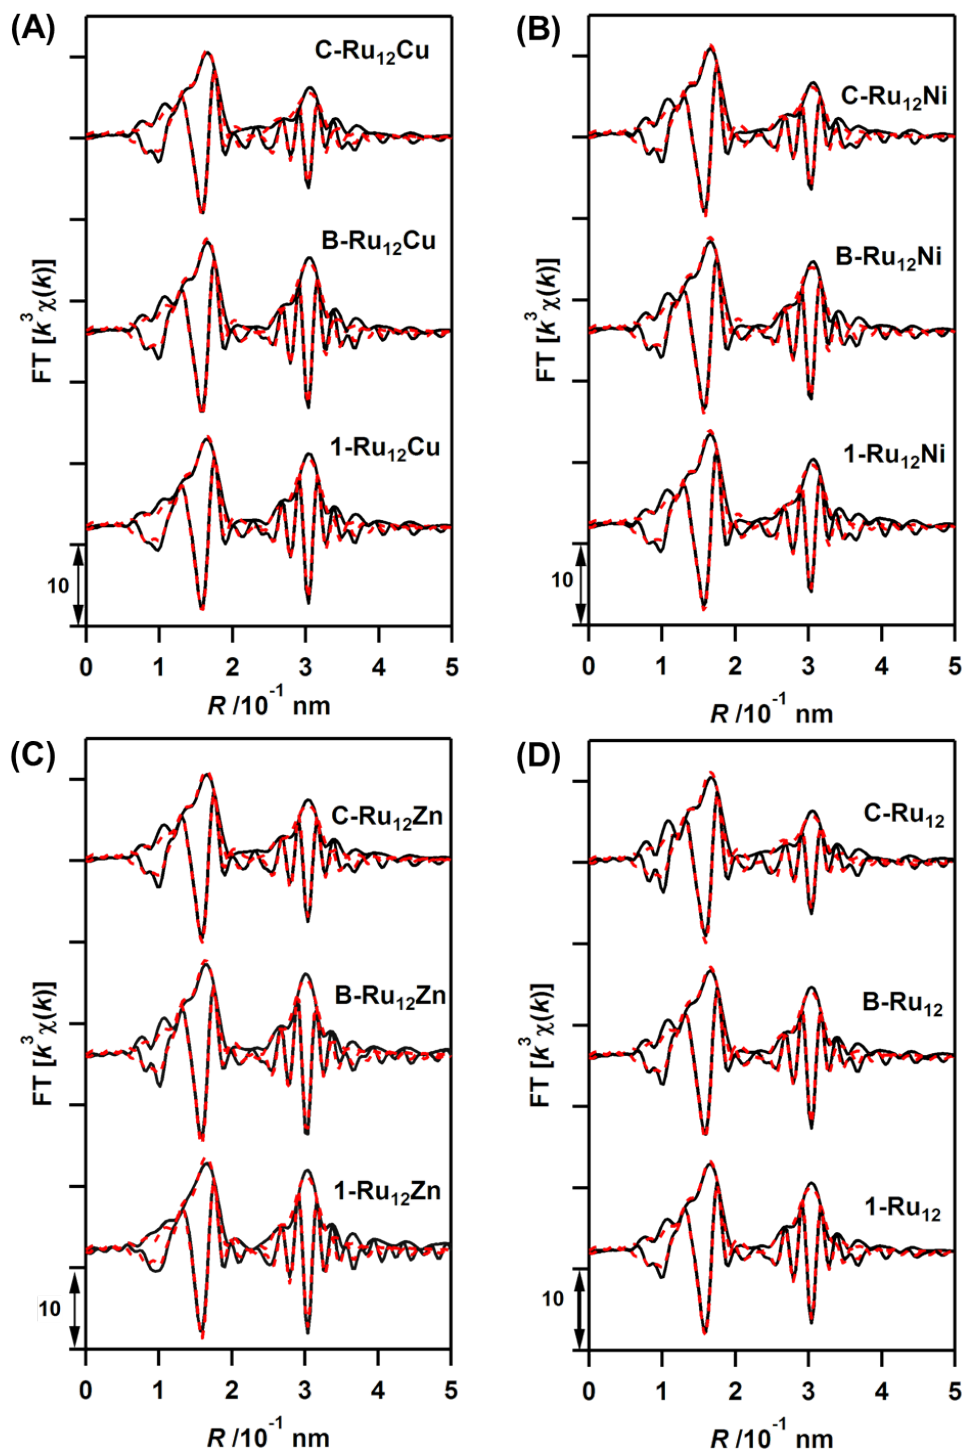

**Fig. S4.**  $k^3$ -Weighted Ru K-edge EXAFS Fourier transforms ( $k = 30\text{--}160 \text{ nm}^{-1}$ ) for (A) **1-Ru<sub>12</sub>Cu**, **B-Ru<sub>12</sub>Cu**, and **C-Ru<sub>12</sub>Cu**; (B) **1-Ru<sub>12</sub>Ni**, **B-Ru<sub>12</sub>Ni**, and **C-Ru<sub>12</sub>Ni**; (C) **1-Ru<sub>12</sub>Zn**, **B-Ru<sub>12</sub>Zn**, and **C-Ru<sub>12</sub>Zn**; and (D) **1-Ru<sub>12</sub>**, **B-Ru<sub>12</sub>**, and **C-Ru<sub>12</sub>**. All of the samples were measured at 20 K. The black solid lines show the observed data and the red dashed lines show the fitted data.

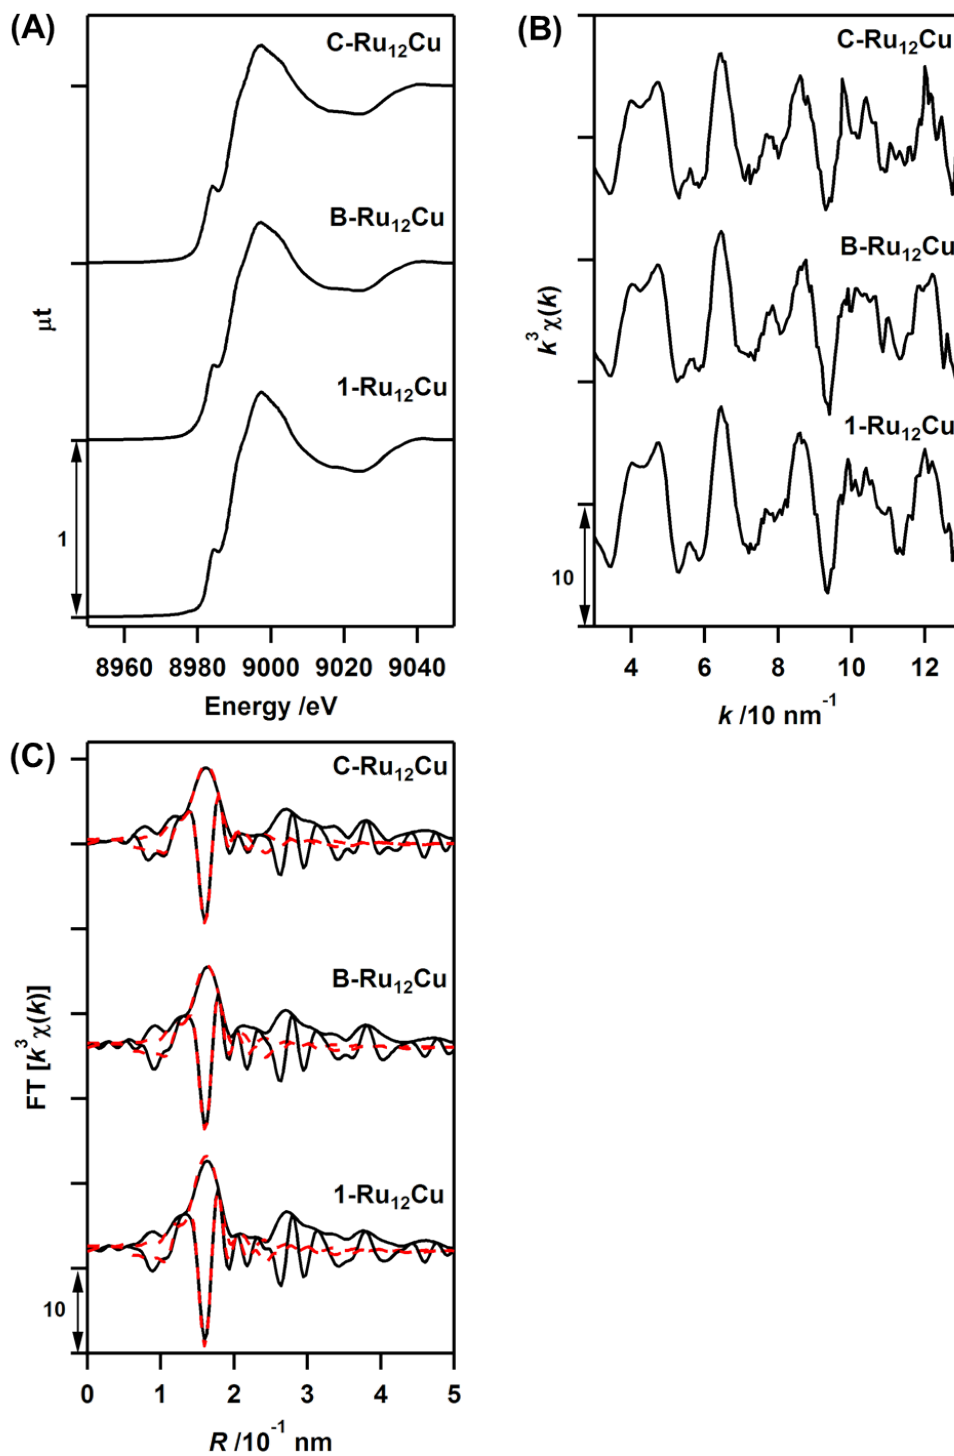

**Fig. S5.** (A) Normalized Cu K-edge XANES spectra, (B)  $k^3$ -weighted Cu K-edge EXAFS oscillations, and (C) their Fourier transforms ( $k = 30\text{--}130 \text{ nm}^{-1}$ ) for **1-Ru<sub>12</sub>Cu**, **B-Ru<sub>12</sub>Cu**, and **C-Ru<sub>12</sub>Cu**. All of the samples were measured at 20 K. In (C), the black solid lines show the observed data and the red dashed lines show the fitted data.

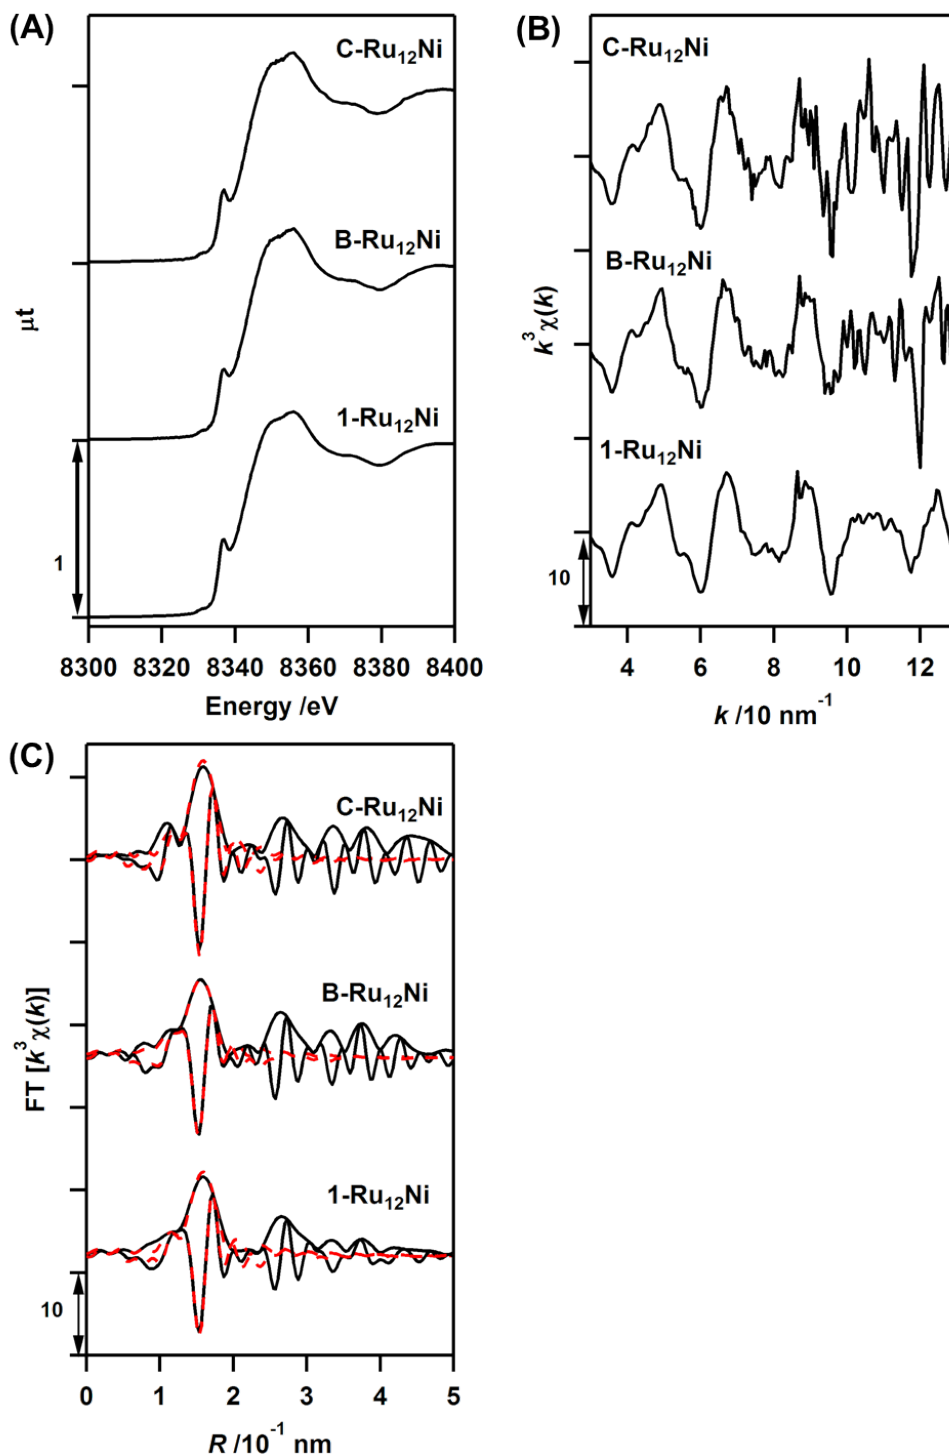

**Fig. S6.** (A) Normalized Ni K-edge XANES spectra, (B)  $k^3$ -weighted Ni K-edge EXAFS oscillations, and (C) their Fourier transforms ( $k = 30\text{--}130 \text{ nm}^{-1}$ ) for **1-Ru<sub>12</sub>Ni**, **B-Ru<sub>12</sub>Ni**, and **C-Ru<sub>12</sub>Ni**. All of the samples were measured at 20 K. In (C), the black solid lines show the observed data and the red dashed lines show the fitted data.

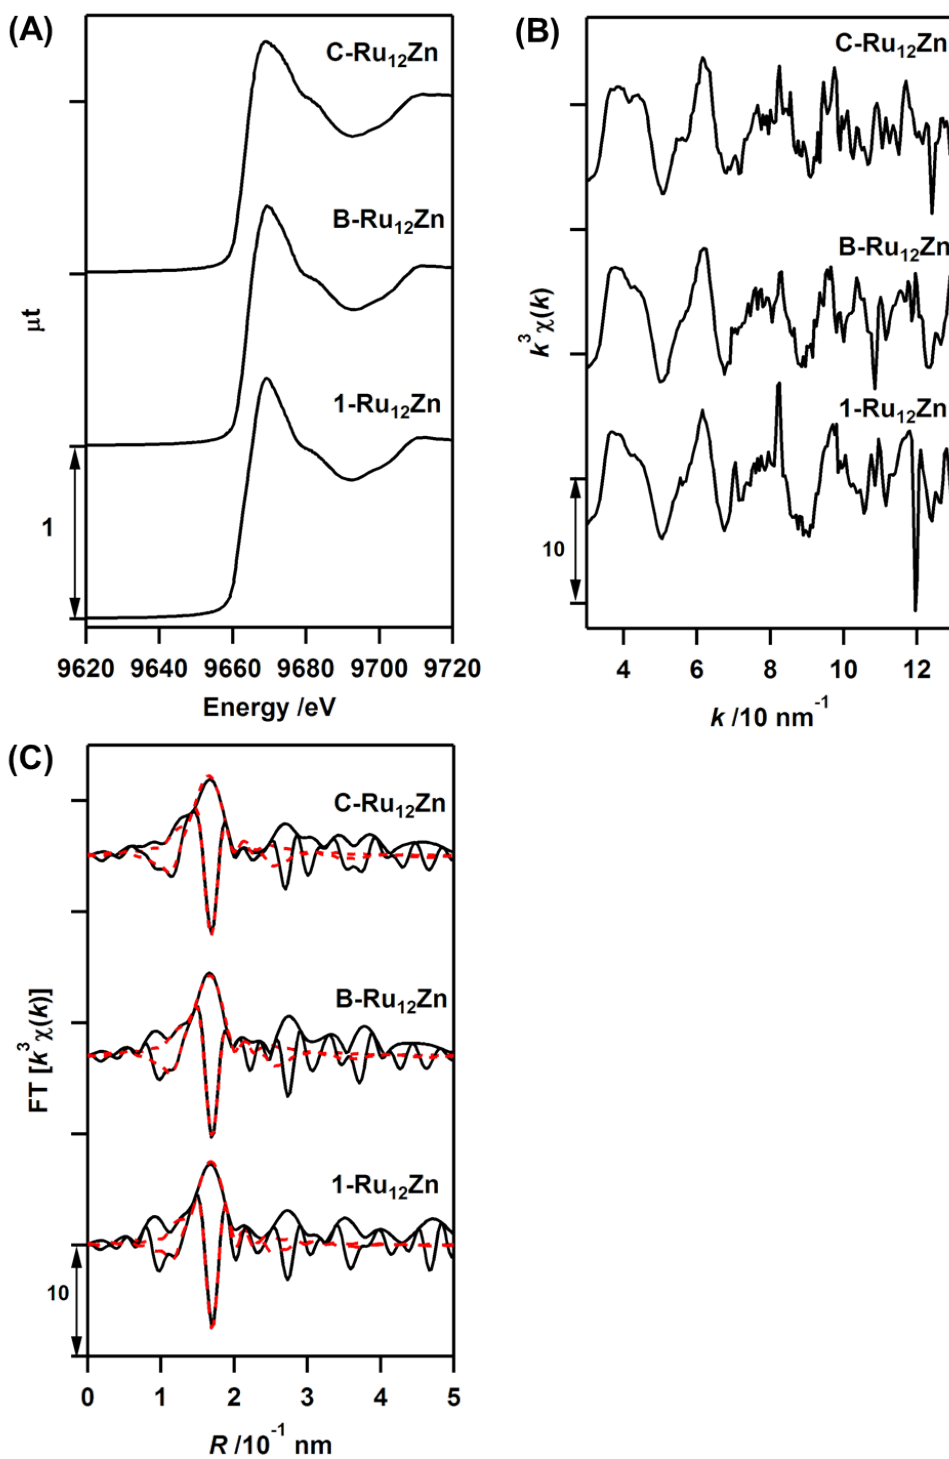

**Fig. S7.** (A) Normalized Zn K-edge XANES spectra, (B)  $k^3$ -weighted Zn K-edge EXAFS oscillations, and (C) their Fourier transforms ( $k = 30\text{--}130 \text{ nm}^{-1}$ ) for **1-Ru<sub>12</sub>Zn**, **B-Ru<sub>12</sub>Zn**, and **C-Ru<sub>12</sub>Zn**. All of the samples were measured at 20 K. In (C), the black solid lines show the observed data and the red dashed lines show the fitted data.



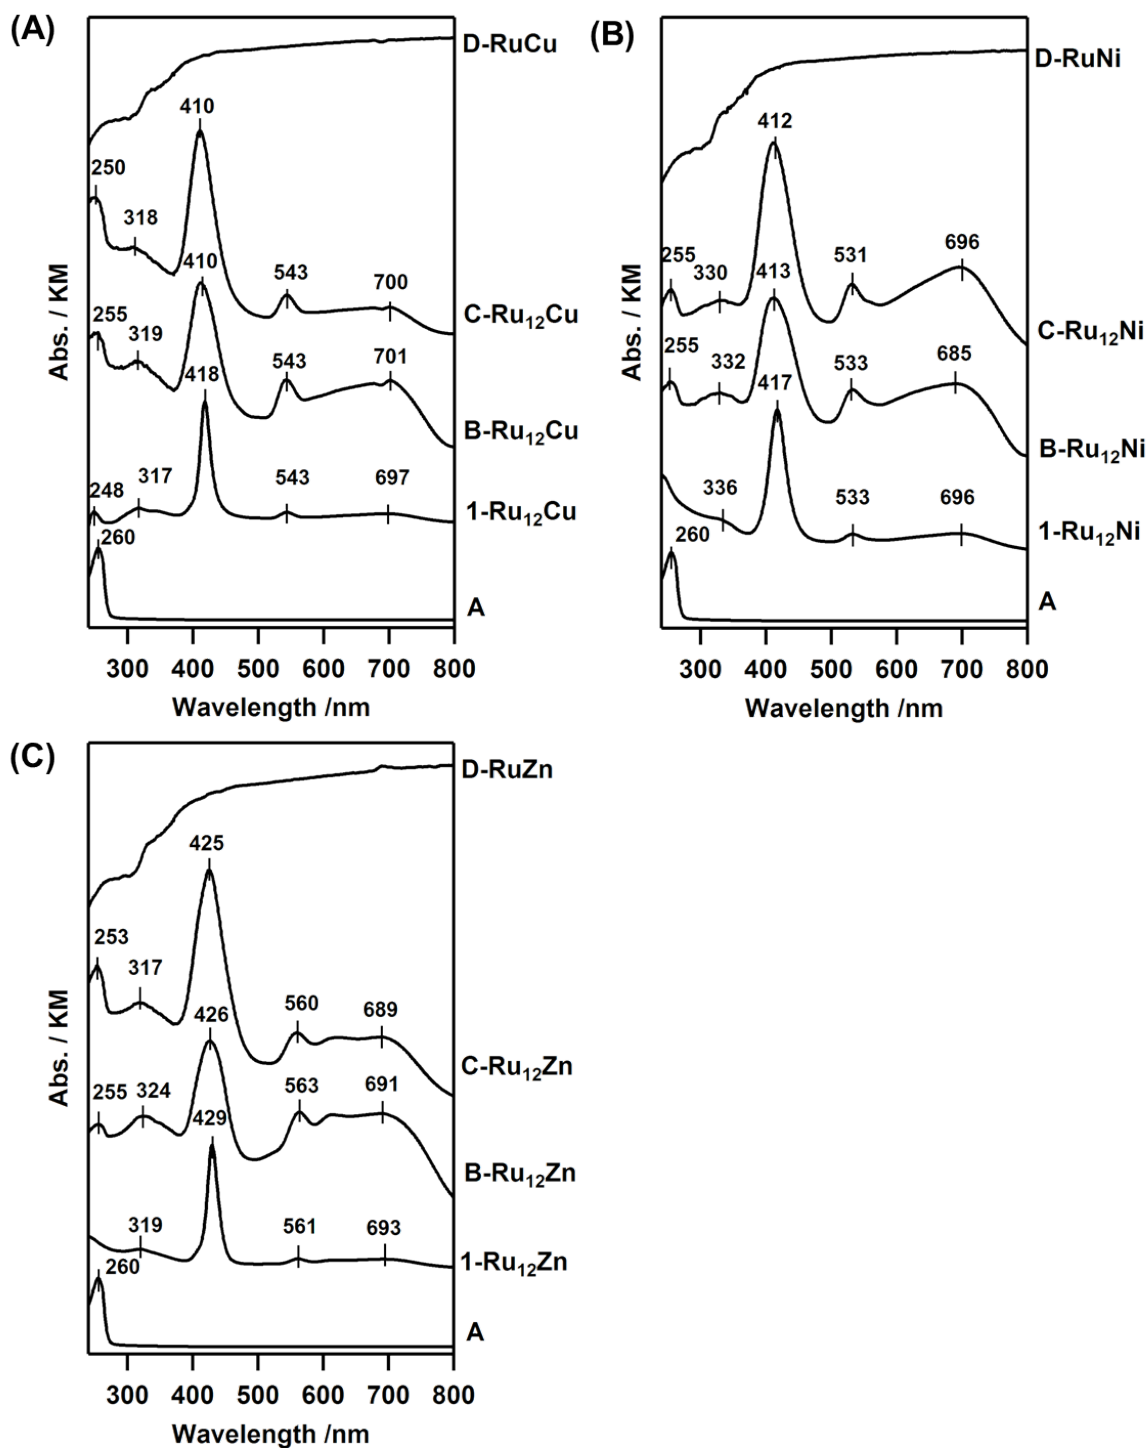

**Fig. S8.** (A) UV/vis spectrum of **1-Ru<sub>12</sub>Cu** (in dichloromethane) and DR UV/vis spectra of **A**, **B-Ru<sub>12</sub>Cu**, **C-Ru<sub>12</sub>Cu**, and **D-RuCu**. (B) UV/vis spectrum of **1-Ru<sub>12</sub>Ni** (in dichloromethane) and DR UV/vis spectra of **A**, **B-Ru<sub>12</sub>Ni**, **C-Ru<sub>12</sub>Ni**, and **D-RuNi**. (C) UV/vis spectrum of **1-Ru<sub>12</sub>Zn** (in dichloromethane) and DR UV/vis spectra of **A**, **B-Ru<sub>12</sub>Zn**, **C-Ru<sub>12</sub>Zn**, and **D-RuZn**.

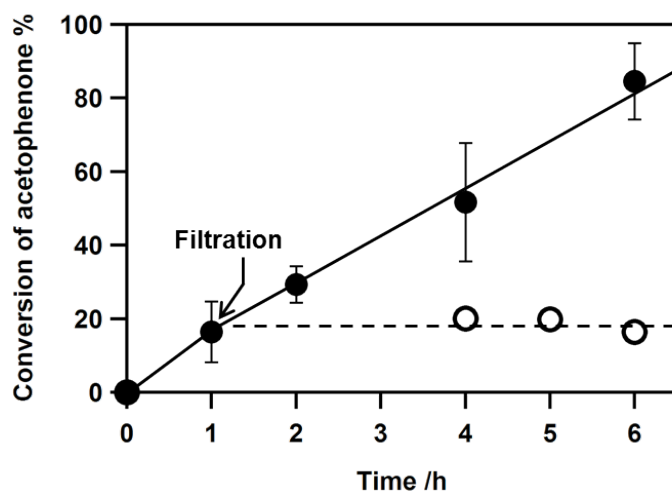

**Fig. S9.** Conversion of acetophenone for various reaction times on **D-RuCu** (●: Data from individual batch, not time-course measurements), and test of the heterogeneous nature of **D-RuCu** in the hydrogenation of acetophenone (○: Data of continuous reaction in the filtrate after the filtration of the solid catalyst at 20% conversion). Ru =  $1.1 \times 10^{-6}$  mol, Ru/acetophenone/dodecane (internal standard) = 1/500/250 (molar ratio), 0.18 mol L<sup>-1</sup> of acetophenone in 1,4-dioxane, 363 K, 2.0 MPa of H<sub>2</sub>, The amounts of the reactant and products were evaluated by GC and GC-MS with internal standard method.

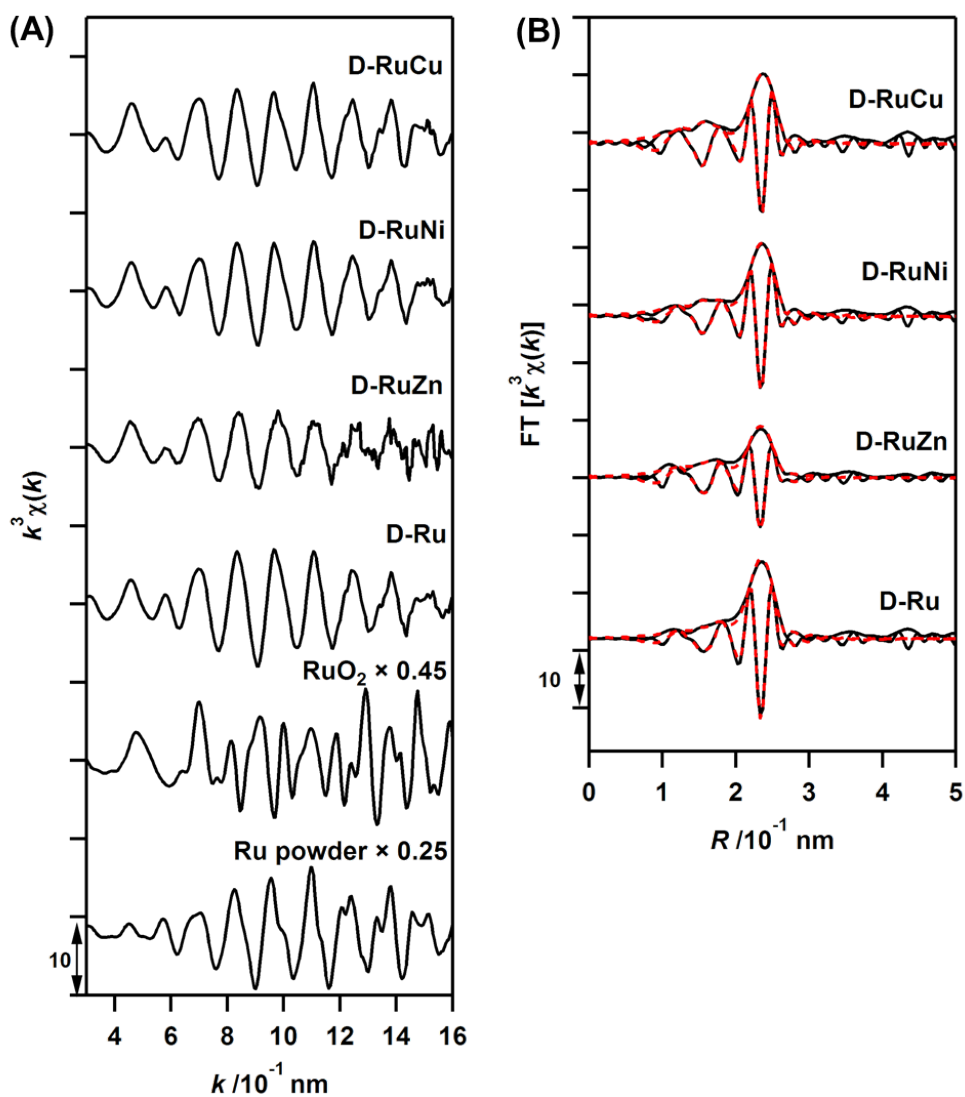

**Fig. S10.** (A)  $k^3$ -Weighted Ru K-edge EXAFS oscillations for **D-RuCu**, **D-RuNi**, **D-RuZn**, **D-Ru**, RuO<sub>2</sub>, and Ru powder, and (B) their Fourier transforms ( $k = 30\text{--}160 \text{ nm}^{-1}$ ) for **D-RuCu**, **D-RuNi**, **D-RuZn**, and **D-Ru**. All of the samples were measured at 20 K. In (B), the black solid lines show the observed data and the red dashed lines show the fitted data.

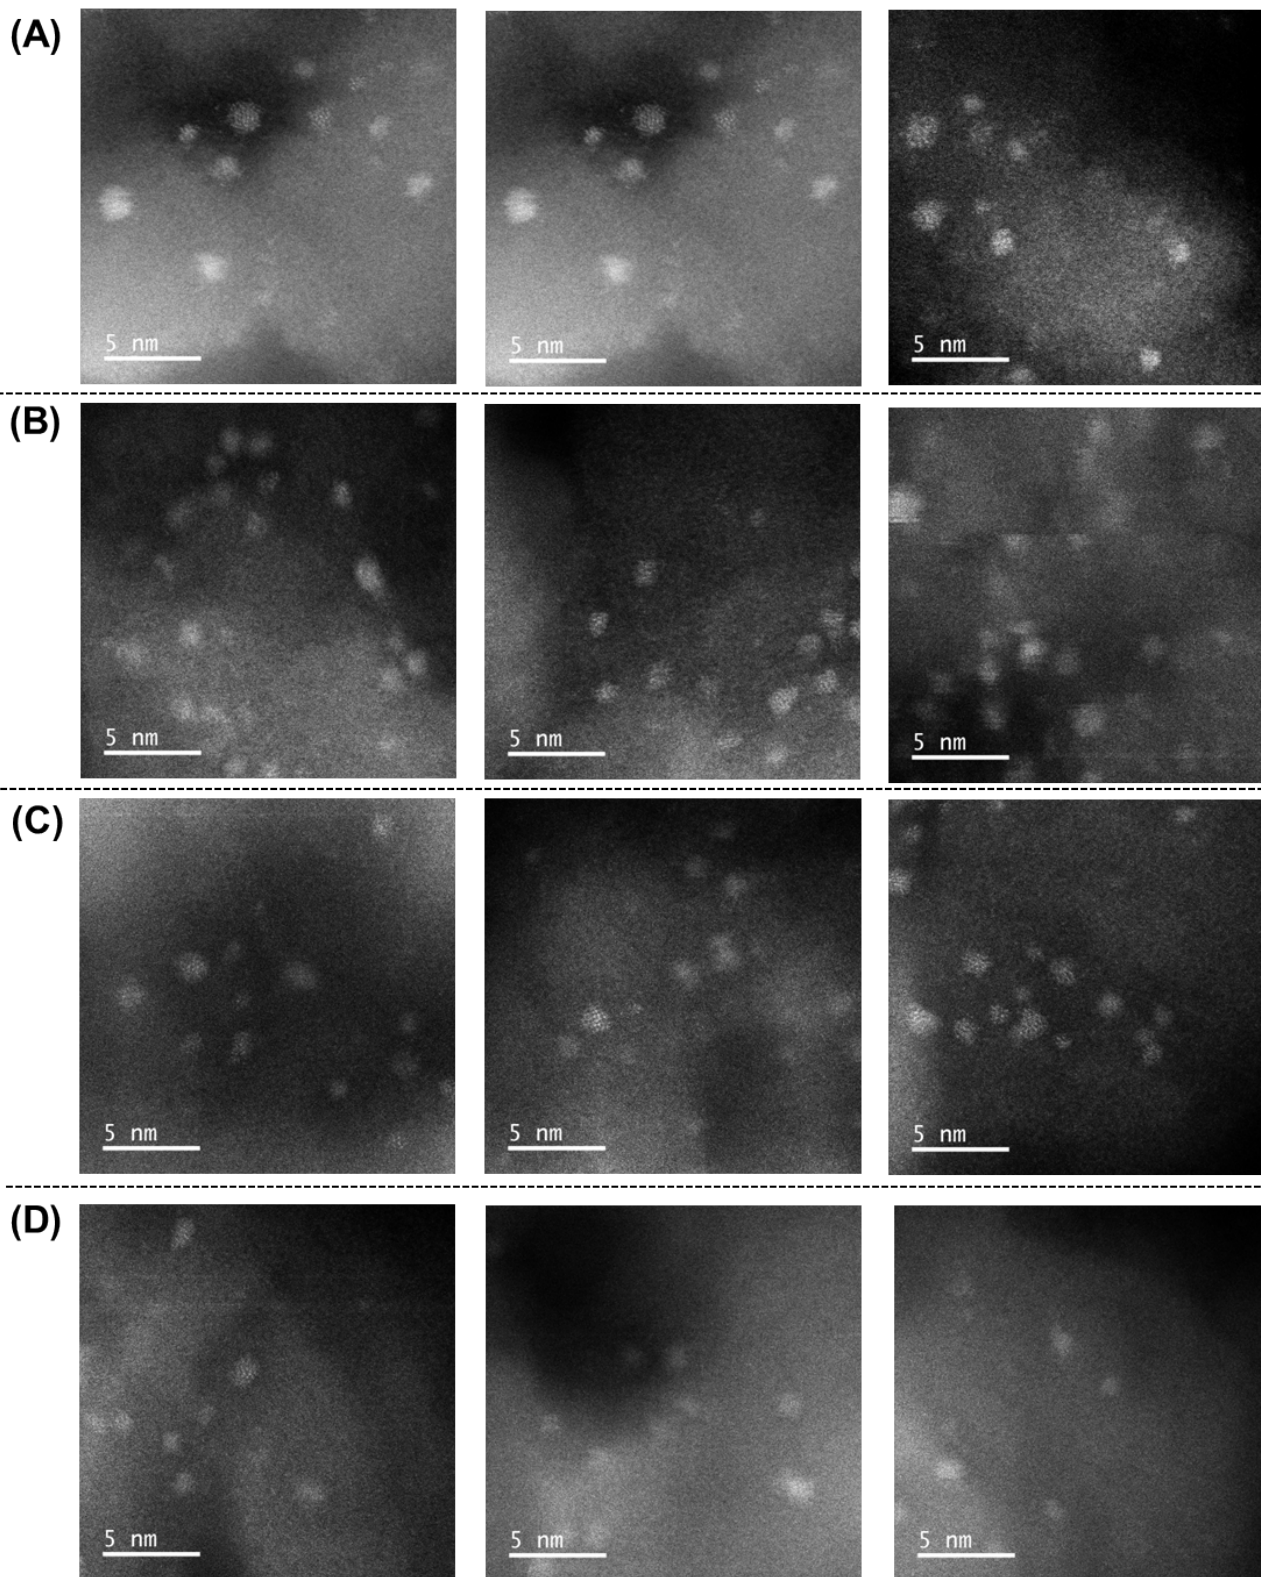

**Fig. S11.** HAADF-STEM images of (A) **D-RuCu**, (B) **D-RuNi**, (C) **D-RuZn**, and (D) **D-Ru**.

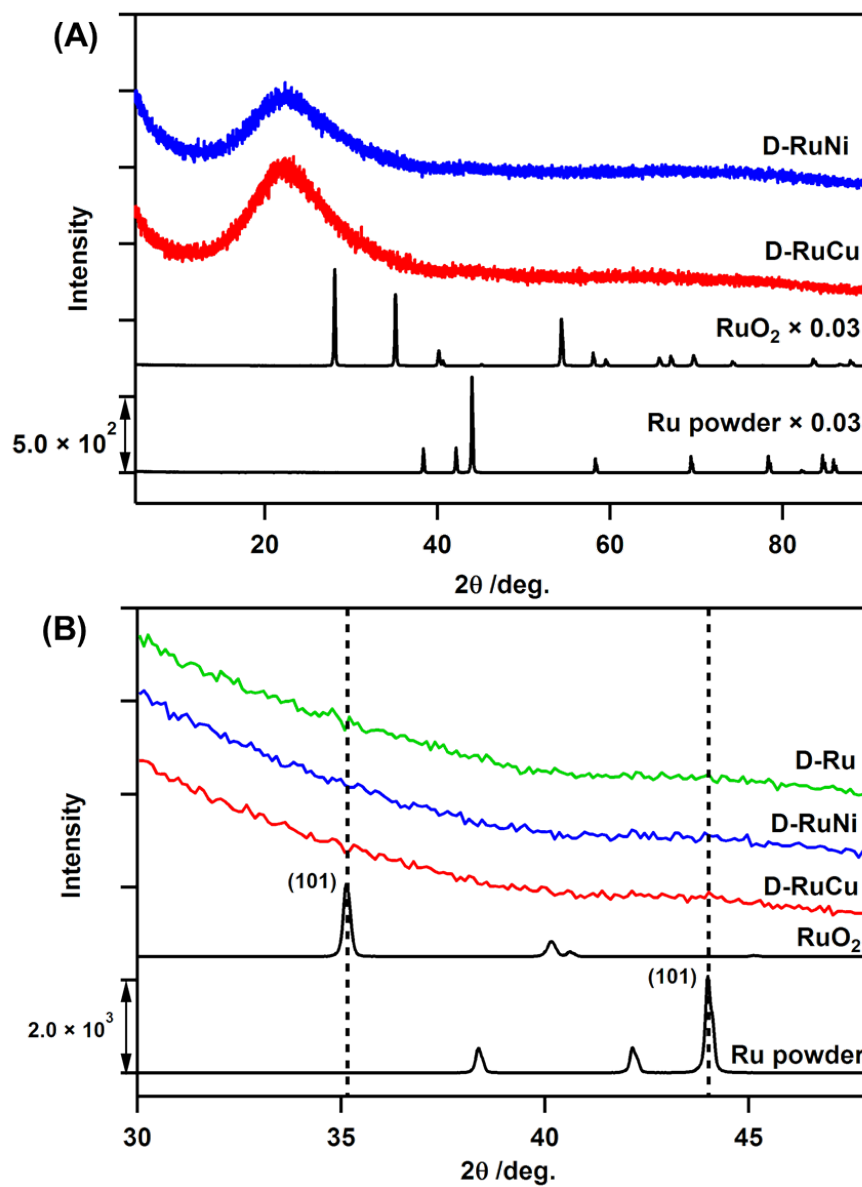

**Fig. S12.** (A) Wide-angle XRD spectra of Ru powder, RuO<sub>2</sub>, **D-RuCu**, and **D-RuNi**. (B) Narrow-angle XRD spectra of Ru powder, RuO<sub>2</sub>, **D-RuCu**, **D-RuNi**, and **D-Ru**.

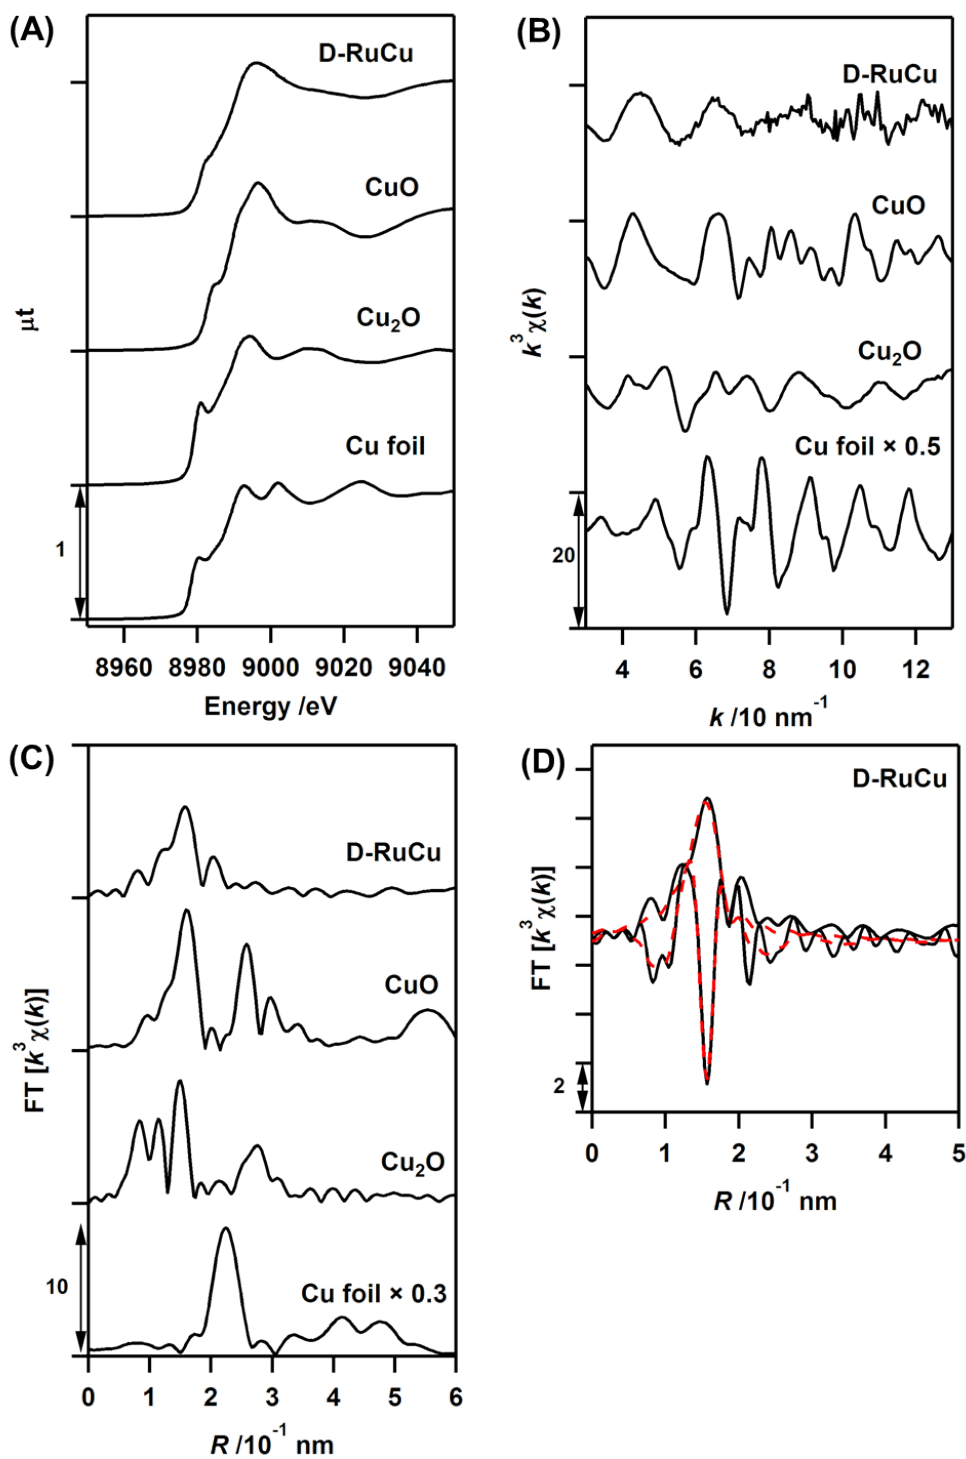

**Fig. S13.** (A) Normalized Cu K-edge XANES spectra, (B)  $k^3$ -weighted Cu K-edge EXAFS oscillations, and (C) their Fourier transforms for **D-RuCu**, CuO, Cu<sub>2</sub>O, and Cu foil. All of the samples were measured at 20 K. (D) Curve-fitting data for the  $k^3$ -weighted Cu K-edge EXAFS Fourier transform ( $k = 30\text{--}130 \text{ nm}^{-1}$ ) for **D-RuCu**. In (D), the black solid lines show the observed data and the red dashed lines show the fitted data.

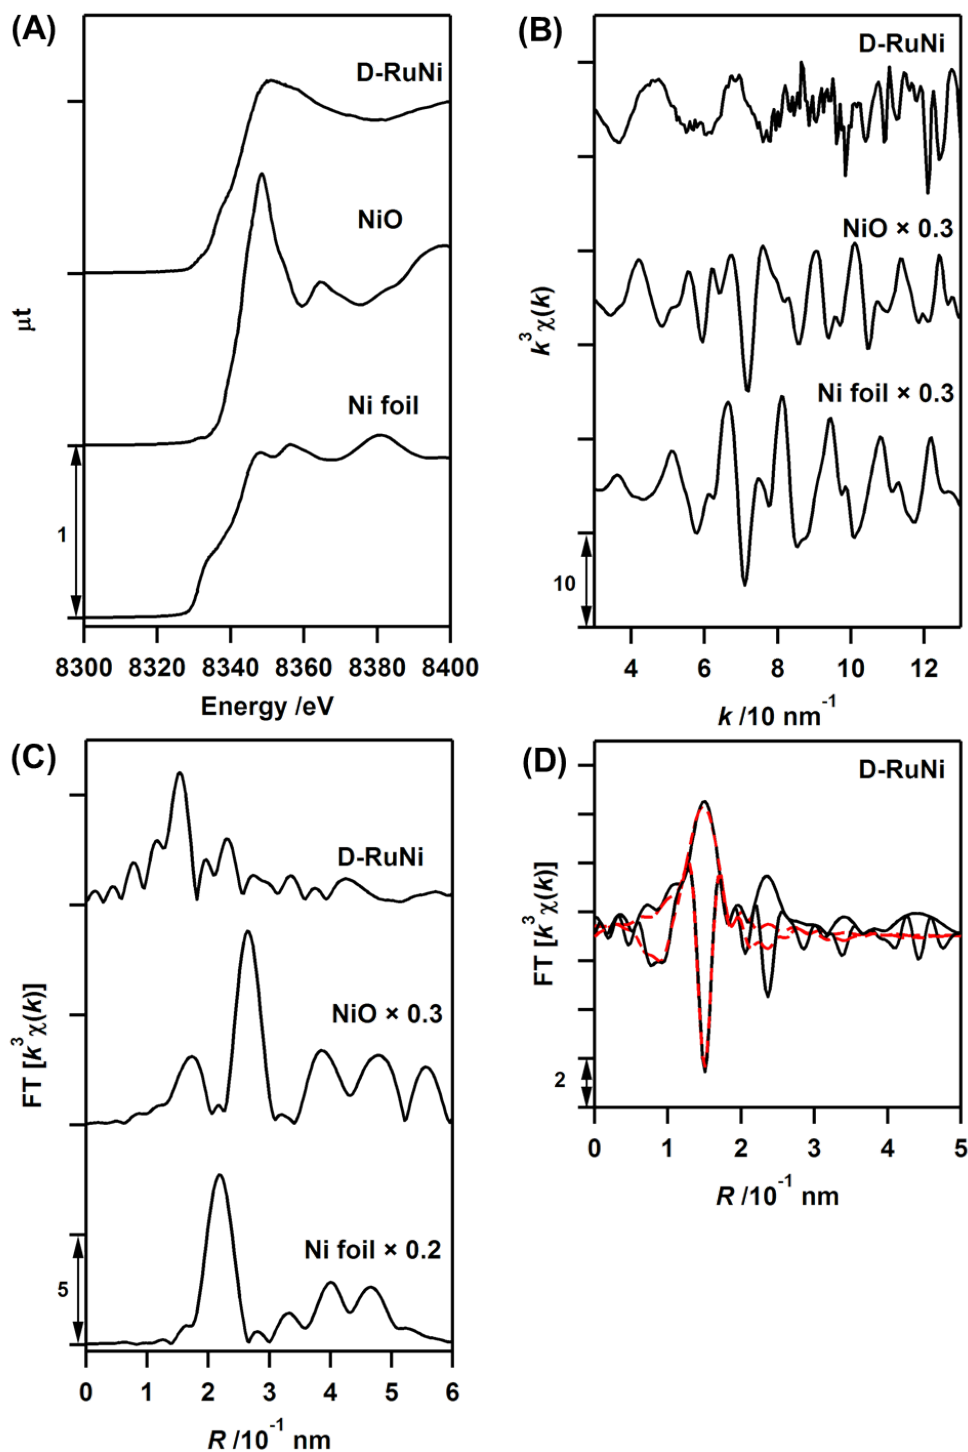

**Fig. S14.** (A) Normalized Ni K-edge XANES spectra, (B)  $k^3$ -weighted Ni K-edge EXAFS oscillations, and (C) their Fourier transforms for **D-RuNi**, NiO, and Ni foil. All of the samples were measured at 20 K. (D) Curve-fitting data for the  $k^3$ -weighted Ni K-edge EXAFS Fourier transform ( $k = 30\text{--}120 \text{ nm}^{-1}$ ) for **D-RuNi**. In (D), the black solid lines show the observed data and the red dashed lines show the fitted data.

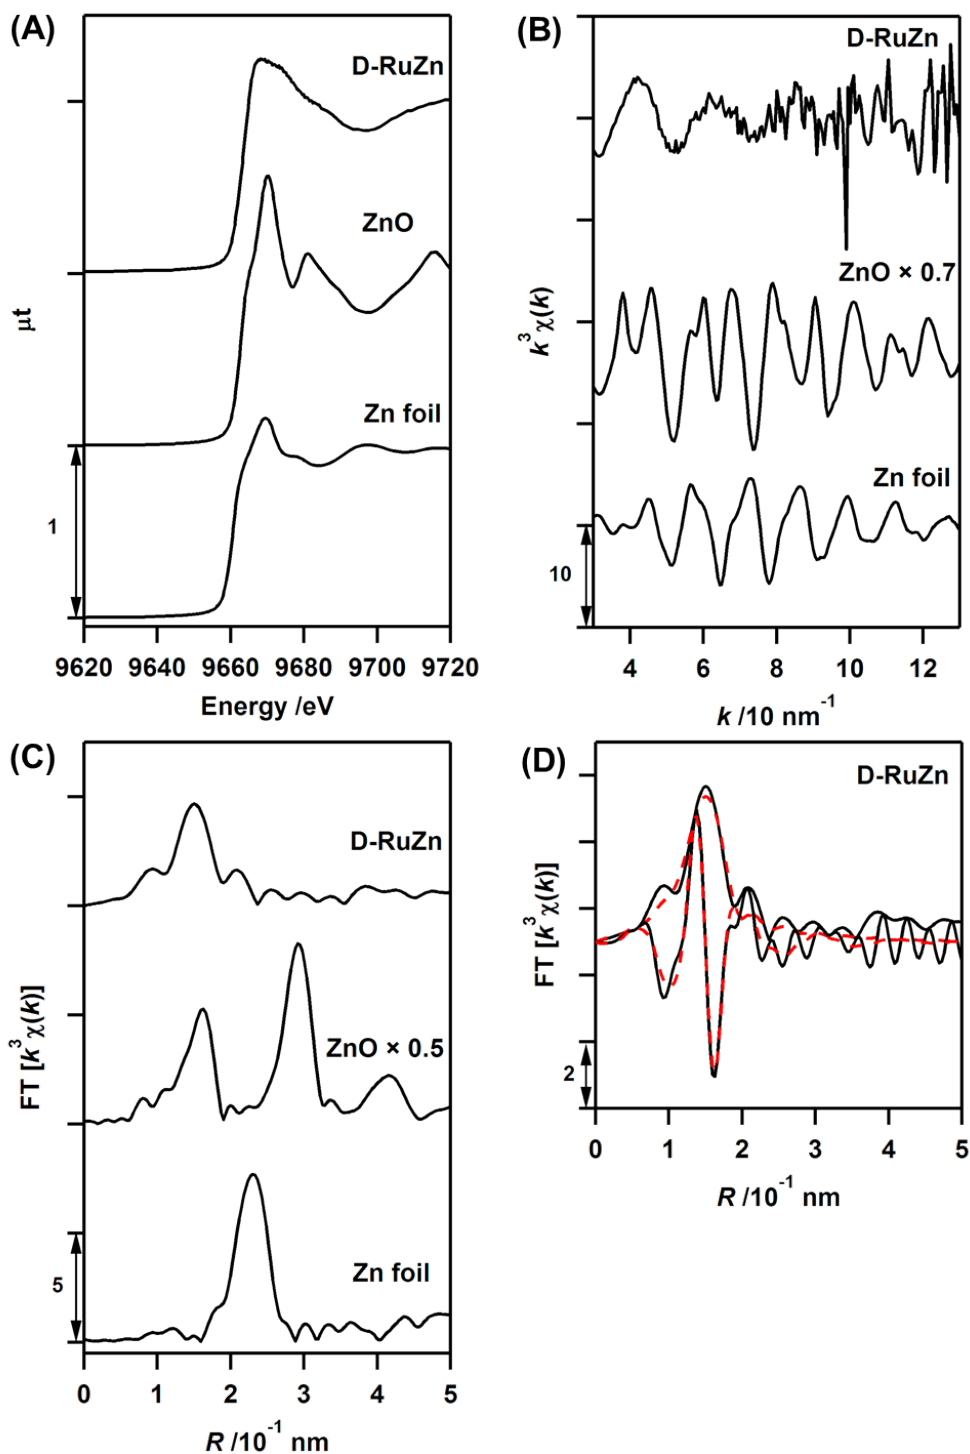

**Fig. S15.** (A) Normalized Zn K-edge XANES spectra, (B)  $k^3$ -weighted Zn K-edge EXAFS oscillations, and (C) their Fourier transforms for **D-RuZn**, ZnO, and Zn foil. All of the samples were measured at 20 K. (D) Curve-fitting data for the  $k^3$ -weighted Ni K-edge EXAFS Fourier transform ( $k = 30\text{--}105\text{ nm}^{-1}$ ) for **D-RuZn**. In (D), the black solid lines show the observed data and the red dashed lines show the fitted data.



**Table S1.** Summary of XRF Data

| Sample                     | Ru / wt %   | M / wt %         |
|----------------------------|-------------|------------------|
| <b>B-Ru<sub>12</sub>Cu</b> | 1.2 ± 0.2   | 0.06 ± 0.04 (Cu) |
| <b>B-Ru<sub>12</sub>Ni</b> | 1.2 ± 0.2   | 0.06 ± 0.04 (Ni) |
| <b>B-Ru<sub>12</sub>Zn</b> | 1.2 ± 0.2   | 0.09 ± 0.07 (Zn) |
| <b>C-Ru<sub>12</sub>Cu</b> | 0.68 ± 0.03 | 0.04 ± 0.02 (Cu) |
| <b>C-Ru<sub>12</sub>Ni</b> | 0.70 ± 0.05 | 0.03 ± 0.02 (Ni) |
| <b>C-Ru<sub>12</sub>Zn</b> | 0.70 ± 0.03 | 0.06 ± 0.05 (Zn) |
| <b>D-RuCu</b>              | 0.72 ± 0.07 | 0.04 ± 0.02 (Cu) |
| <b>D-RuNi</b>              | 0.73 ± 0.04 | 0.03 ± 0.02 (Ni) |
| <b>D-RuZn</b>              | 0.82 ± 0.05 | 0.05 ± 0.03 (Zn) |

**Table S2.** Structural Parameters Obtained by Curve-fitting Analysis of Ru K-edge EXAFS Measured at 20 K<sup>a</sup>

| Shell                                  | CN        | $R / \text{nm}$ | $\Delta E_0$ | $\sigma^2 / 10^5 \text{ nm}^2$ |
|----------------------------------------|-----------|-----------------|--------------|--------------------------------|
| <b>1-Ru<sub>12</sub>Cu<sup>b</sup></b> |           |                 |              |                                |
| Ru···Ru                                | 1.9 ± 0.6 | 0.334 ± 0.001   | -3 ± 4       | 3 ± 1                          |
| Ru-O (μ-O)                             | 1.0 ± 0.2 | 0.193 ± 0.006   | -2 ± 3       | 3 ± 2                          |
| Ru-O (CH <sub>3</sub> COO)             | 4.0 ± 0.7 | 0.205 ± 0.004   | -2 ± 3       | 3 ± 2                          |
| Ru-N (py)                              | 1.0 ± 0.2 | 0.209 ± 0.018   | -2 ± 3       | 3 ± 2                          |
| Ru···C (CH <sub>3</sub> COO, py)       | 6.0 ± 1.0 | 0.303 ± 0.002   | -2 ± 3       | 3 ± 2                          |
| <b>B-Ru<sub>12</sub>Cu<sup>c</sup></b> |           |                 |              |                                |
| Ru···Ru                                | 1.8 ± 0.6 | 0.334 ± 0.001   | -3 ± 4       | 2 ± 1                          |
| Ru-O (μ-O)                             | 1.1 ± 0.2 | 0.191 ± 0.005   | -3 ± 3       | 3 ± 2                          |
| Ru-O (CH <sub>3</sub> COO)             | 4.3 ± 0.8 | 0.205 ± 0.002   | -3 ± 3       | 3 ± 2                          |
| Ru-N (py)                              | 1.1 ± 0.2 | 0.203 ± 0.010   | -3 ± 3       | 3 ± 2                          |
| Ru···C (CH <sub>3</sub> COO, py)       | 6.4 ± 1.2 | 0.303 ± 0.002   | -3 ± 3       | 3 ± 2                          |
| <b>C-Ru<sub>12</sub>Cu<sup>d</sup></b> |           |                 |              |                                |
| Ru···Ru                                | 1.2 ± 0.6 | 0.335 ± 0.002   | -1 ± 6       | 3 ± 2                          |
| Ru-O (μ-O)                             | 1.1 ± 0.2 | 0.190 ± 0.006   | -3 ± 3       | 4 ± 1                          |
| Ru-O (CH <sub>3</sub> COO)             | 4.3 ± 0.8 | 0.205 ± 0.009   | -3 ± 3       | 4 ± 1                          |
| Ru-N (py)                              | 1.1 ± 0.2 | 0.206 ± 0.040   | -3 ± 3       | 4 ± 1                          |
| Ru···C (CH <sub>3</sub> COO, py)       | 6.5 ± 1.2 | 0.302 ± 0.002   | -3 ± 3       | 4 ± 1                          |
| <b>1-Ru<sub>12</sub>Ni<sup>e</sup></b> |           |                 |              |                                |
| Ru···Ru                                | 2.0 ± 0.7 | 0.334 ± 0.001   | 0 ± 4        | 3 ± 1                          |
| Ru-O (μ-O)                             | 1.1 ± 0.2 | 0.189 ± 0.004   | -2 ± 2       | 3 ± 2                          |
| Ru-O (CH <sub>3</sub> COO)             | 4.4 ± 0.7 | 0.204 ± 0.004   | -2 ± 2       | 3 ± 2                          |
| Ru-N (py)                              | 1.1 ± 0.2 | 0.204 ± 0.020   | -2 ± 2       | 3 ± 2                          |
| Ru···C (CH <sub>3</sub> COO, py)       | 6.7 ± 1.1 | 0.302 ± 0.002   | -2 ± 2       | 3 ± 2                          |
| <b>B-Ru<sub>12</sub>Ni<sup>f</sup></b> |           |                 |              |                                |
| Ru···Ru                                | 1.9 ± 0.7 | 0.334 ± 0.001   | -1 ± 4       | 3 ± 1                          |
| Ru-O (μ-O)                             | 1.1 ± 0.2 | 0.190 ± 0.004   | -2 ± 3       | 3 ± 2                          |
| Ru-O (CH <sub>3</sub> COO)             | 4.4 ± 0.7 | 0.205 ± 0.001   | -2 ± 3       | 3 ± 2                          |
| Ru-N (py)                              | 1.1 ± 0.2 | 0.201 ± 0.007   | -2 ± 3       | 3 ± 2                          |
| Ru···C (CH <sub>3</sub> COO, py)       | 6.6 ± 1.1 | 0.302 ± 0.002   | -2 ± 3       | 3 ± 2                          |
| <b>C-Ru<sub>12</sub>Ni<sup>g</sup></b> |           |                 |              |                                |
| Ru···Ru                                | 1.4 ± 0.7 | 0.334 ± 0.002   | -1 ± 5       | 3 ± 2                          |
| Ru-O (μ-O)                             | 1.1 ± 0.2 | 0.190 ± 0.004   | -3 ± 3       | 3 ± 2                          |
| Ru-O (CH <sub>3</sub> COO)             | 4.4 ± 0.8 | 0.205 ± 0.002   | -3 ± 3       | 3 ± 2                          |
| Ru-N (py)                              | 1.1 ± 0.2 | 0.203 ± 0.011   | -3 ± 3       | 3 ± 2                          |
| Ru···C (CH <sub>3</sub> COO, py)       | 6.6 ± 1.2 | 0.302 ± 0.002   | -3 ± 3       | 3 ± 2                          |
| <b>1-Ru<sub>12</sub>Zn<sup>h</sup></b> |           |                 |              |                                |

|                                        |           |               |        |       |
|----------------------------------------|-----------|---------------|--------|-------|
| Ru···Ru                                | 1.9 ± 0.6 | 0.334 ± 0.001 | -6 ± 4 | 2 ± 1 |
| Ru-O (μ-O)                             | 0.9 ± 0.2 | 0.194 ± 0.005 | -4 ± 3 | 2 ± 2 |
| Ru-O (CH <sub>3</sub> COO)             | 3.6 ± 0.8 | 0.205 ± 0.007 | -4 ± 3 | 2 ± 2 |
| Ru-N (py)                              | 0.9 ± 0.2 | 0.207 ± 0.028 | -4 ± 3 | 2 ± 2 |
| Ru···C (CH <sub>3</sub> COO, py)       | 5.4 ± 1.2 | 0.304 ± 0.002 | -4 ± 3 | 2 ± 2 |
| <b>B-Ru<sub>12</sub>Zn<sup>i</sup></b> |           |               |        |       |
| Ru···Ru                                | 2.0 ± 0.7 | 0.332 ± 0.001 | -6 ± 4 | 3 ± 1 |
| Ru-O (μ-O)                             | 1.1 ± 0.2 | 0.191 ± 0.004 | -6 ± 3 | 2 ± 2 |
| Ru-O (CH <sub>3</sub> COO)             | 4.2 ± 0.7 | 0.205 ± 0.001 | -6 ± 3 | 2 ± 2 |
| Ru-N (py)                              | 1.1 ± 0.2 | 0.201 ± 0.007 | -6 ± 3 | 2 ± 2 |
| Ru···C (CH <sub>3</sub> COO, py)       | 6.3 ± 1.0 | 0.302 ± 0.002 | -6 ± 3 | 2 ± 2 |
| <b>C-Ru<sub>12</sub>Zn<sup>j</sup></b> |           |               |        |       |
| Ru···Ru                                | 1.4 ± 0.6 | 0.335 ± 0.002 | -3 ± 5 | 2 ± 1 |
| Ru-O (μ-O)                             | 1.1 ± 0.2 | 0.191 ± 0.006 | -4 ± 3 | 4 ± 2 |
| Ru-O (CH <sub>3</sub> COO)             | 4.4 ± 0.8 | 0.205 ± 0.007 | -4 ± 3 | 4 ± 2 |
| Ru-N (py)                              | 1.1 ± 0.2 | 0.206 ± 0.031 | -4 ± 3 | 4 ± 2 |
| Ru···C (CH <sub>3</sub> COO, py)       | 6.5 ± 1.2 | 0.302 ± 0.002 | -4 ± 3 | 4 ± 2 |
| <b>1-Ru<sub>12</sub><sup>k</sup></b>   |           |               |        |       |
| Ru···Ru                                | 1.9 ± 0.6 | 0.335 ± 0.001 | -4 ± 3 | 3 ± 1 |
| Ru-O (μ-O)                             | 1.0 ± 0.2 | 0.191 ± 0.005 | -4 ± 2 | 3 ± 2 |
| Ru-O (CH <sub>3</sub> COO)             | 4.2 ± 0.7 | 0.205 ± 0.004 | -4 ± 2 | 3 ± 2 |
| Ru-N (py)                              | 1.0 ± 0.2 | 0.205 ± 0.016 | -4 ± 2 | 3 ± 2 |
| Ru···C (CH <sub>3</sub> COO, py)       | 6.3 ± 1.0 | 0.303 ± 0.002 | -4 ± 2 | 3 ± 2 |
| <b>B-Ru<sub>12</sub><sup>l</sup></b>   |           |               |        |       |
| Ru···Ru                                | 2.0 ± 0.7 | 0.334 ± 0.001 | -5 ± 4 | 3 ± 1 |
| Ru-O (μ-O)                             | 1.1 ± 0.2 | 0.191 ± 0.004 | -4 ± 3 | 3 ± 2 |
| Ru-O (CH <sub>3</sub> COO)             | 4.3 ± 0.6 | 0.206 ± 0.001 | -4 ± 3 | 3 ± 2 |
| Ru-N (py)                              | 1.1 ± 0.2 | 0.201 ± 0.006 | -4 ± 3 | 3 ± 2 |
| Ru···C (CH <sub>3</sub> COO, py)       | 6.4 ± 0.9 | 0.303 ± 0.002 | -4 ± 3 | 3 ± 2 |
| <b>C-Ru<sub>12</sub><sup>m</sup></b>   |           |               |        |       |
| Ru···Ru                                | 1.4 ± 0.9 | 0.334 ± 0.002 | -3 ± 7 | 3 ± 2 |
| Ru-O (μ-O)                             | 1.1 ± 0.2 | 0.190 ± 0.005 | -4 ± 3 | 3 ± 2 |
| Ru-O (CH <sub>3</sub> COO)             | 4.3 ± 0.7 | 0.206 ± 0.001 | -4 ± 3 | 3 ± 2 |
| Ru-N (py)                              | 1.1 ± 0.2 | 0.202 ± 0.008 | -4 ± 3 | 3 ± 2 |
| Ru···C (CH <sub>3</sub> COO, py)       | 6.4 ± 1.1 | 0.302 ± 0.003 | -4 ± 3 | 3 ± 2 |
| <b>D-RuCu<sup>n</sup></b>              |           |               |        |       |
| Ru-Ru                                  | 3.4 ± 0.3 | 0.267 ± 0.001 | 3 ± 1  | 6 ± 1 |
| Ru-O                                   | 1.3 ± 0.6 | 0.183 ± 0.004 | 0 ± 4  | 8 ± 3 |
| Ru-O                                   | 3.2 ± 1.2 | 0.200 ± 0.002 | 0 ± 4  | 8 ± 3 |

| <b>D-RuNi<sup>o</sup></b> |           |               |       |         |
|---------------------------|-----------|---------------|-------|---------|
| Ru-Ru                     | 3.8 ± 0.3 | 0.266 ± 0.001 | 2 ± 1 | 6 ± 1   |
| Ru-O                      | 1.3 ± 0.6 | 0.183 ± 0.005 | 0 ± 5 | 11 ± 4  |
| Ru-O                      | 3.2 ± 1.4 | 0.202 ± 0.003 | 0 ± 5 | 11 ± 4  |
| <b>D-RuZn<sup>p</sup></b> |           |               |       |         |
| Ru-Ru                     | 3.6 ± 0.8 | 0.265 ± 0.001 | 1 ± 3 | 8 ± 1   |
| Ru-O                      | 1.4 ± 0.9 | 0.185 ± 0.005 | 0 ± 4 | 9 ± 7   |
| Ru-O                      | 2.9 ± 2.0 | 0.204 ± 0.004 | 0 ± 4 | 9 ± 7   |
| <b>D-Ru<sup>q</sup></b>   |           |               |       |         |
| Ru-Ru                     | 4.7 ± 0.5 | 0.266 ± 0.001 | 1 ± 1 | 7 ± 1   |
| Ru-O                      | 1.2 ± 1.2 | 0.186 ± 0.008 | 0 ± 9 | 11 ± 10 |
| Ru-O                      | 2.3 ± 2.1 | 0.206 ± 0.006 | 0 ± 9 | 11 ± 10 |

<sup>a</sup>  $S_0^2$  was fixed to be 1. <sup>k</sup>  $k = 30-160 \text{ nm}^{-1}$ . <sup>b</sup>  $R = 0.10-0.35 \text{ nm}$ ,  $R_f = 2.1\%$ . <sup>c</sup>  $R = 0.10-0.35 \text{ nm}$ ,  $R_f = 2.3\%$ . <sup>d</sup>  $R = 0.10-0.35 \text{ nm}$ ,  $R_f = 3.6\%$ . <sup>e</sup>  $R = 0.10-0.35 \text{ nm}$ ,  $R_f = 2.4\%$ . <sup>f</sup>  $R = 0.10-0.35 \text{ nm}$ ,  $R_f = 2.7\%$ . <sup>g</sup>  $R = 0.10-0.35 \text{ nm}$ ,  $R_f = 3.1\%$ . <sup>h</sup>  $R = 0.10-0.35 \text{ nm}$ ,  $R_f = 2.8\%$ . <sup>i</sup>  $R = 0.10-0.35 \text{ nm}$ ,  $R_f = 2.5\%$ . <sup>j</sup>  $R = 0.10-0.35 \text{ nm}$ ,  $R_f = 3.0\%$ . <sup>k</sup>  $R = 0.10-0.35 \text{ nm}$ ,  $R_f = 1.9\%$ . <sup>l</sup>  $R = 0.10-0.35 \text{ nm}$ ,  $R_f = 2.4\%$ . <sup>m</sup>  $R = 0.10-0.35 \text{ nm}$ ,  $R_f = 4.6\%$ . <sup>n</sup>  $R = 0.10-0.28 \text{ nm}$ ,  $R_f = 0.6\%$ . <sup>o</sup>  $R = 0.10-0.28 \text{ nm}$ ,  $R_f = 0.4\%$ . <sup>p</sup>  $R = 0.10-0.28 \text{ nm}$ ,  $R_f = 2.1\%$ . <sup>q</sup>  $R = 0.10-0.28 \text{ nm}$ ,  $R_f = 0.8\%$ .

**Table S3.** Structural Parameters Obtained by Curve-fitting Analysis of Cu K-edge EXAFS Measured at 20 K

| Shell                                  | CN            | $R / \text{nm}$   | $\Delta E_0$ | $\sigma^2 / 10^5 \text{nm}^2$ |
|----------------------------------------|---------------|-------------------|--------------|-------------------------------|
| <b>1-Ru<sub>12</sub>Cu<sup>a</sup></b> |               |                   |              |                               |
| Cu-N (porphyrin)                       | 4             | $0.199 \pm 0.001$ | $4 \pm 3$    | $2 \pm 1$                     |
| <b>B-Ru<sub>12</sub>Cu<sup>b</sup></b> |               |                   |              |                               |
| Cu-N (porphyrin)                       | $3.5 \pm 0.5$ | $0.199 \pm 0.001$ | $4 \pm 3$    | $3 \pm 1$                     |
| <b>C-Ru<sub>12</sub>Cu<sup>c</sup></b> |               |                   |              |                               |
| Cu-N (porphyrin)                       | $3.7 \pm 0.3$ | $0.199 \pm 0.001$ | $4 \pm 1$    | $3 \pm 1$                     |
| <b>D-RuCu<sup>d</sup></b>              |               |                   |              |                               |
| Cu-O                                   | $3.4 \pm 0.8$ | $0.193 \pm 0.002$ | $11 \pm 3$   | $7 \pm 2$                     |

<sup>a</sup>  $S_0^2$  was fitted to be 0.97.  $k = 30\text{--}130 \text{nm}^{-1}$ ,  $R = 0.10\text{--}0.20 \text{nm}$ ,  $R_f = 1.7\%$ . <sup>b</sup>  $S_0^2$  was fixed to be 0.97.  $k = 30\text{--}130 \text{nm}^{-1}$ ,  $R = 0.10\text{--}0.20 \text{nm}$ ,  $R_f = 1.5\%$ . <sup>c</sup>  $S_0^2$  was fixed to be 0.97.  $k = 30\text{--}130 \text{nm}^{-1}$ ,  $R = 0.10\text{--}0.20 \text{nm}$ ,  $R_f = 0.6\%$ . <sup>d</sup>  $S_0^2$  was fixed to be 0.67.  $k = 30\text{--}130 \text{nm}^{-1}$ ,  $R = 0.10\text{--}0.19 \text{nm}$ ,  $R_f = 2.5\%$ .

**Table S4.** Structural Parameters Obtained by Curve-fitting Analysis of Ni K-edge EXAFS Measured at 20 K

| Shell                                  | CN            | $R / \text{nm}$   | $\Delta E_0$ | $\sigma^2 / 10^5 \text{nm}^2$ |
|----------------------------------------|---------------|-------------------|--------------|-------------------------------|
| <b>1-Ru<sub>12</sub>Ni<sup>a</sup></b> |               |                   |              |                               |
| Ni-N (porphyrin)                       | 4             | $0.194 \pm 0.001$ | $6 \pm 3$    | $2 \pm 1$                     |
| <b>B-Ru<sub>12</sub>Ni<sup>b</sup></b> |               |                   |              |                               |
| Ni-N (porphyrin)                       | $4.6 \pm 0.8$ | $0.193 \pm 0.001$ | $4 \pm 2$    | $3 \pm 1$                     |
| <b>C-Ru<sub>12</sub>Ni<sup>c</sup></b> |               |                   |              |                               |
| Ni-N (porphyrin)                       | $4.4 \pm 0.9$ | $0.194 \pm 0.001$ | $5 \pm 3$    | $1 \pm 1$                     |
| <b>D-RuNi<sup>d</sup></b>              |               |                   |              |                               |
| Ni-O                                   | $2.0 \pm 0.4$ | $0.188 \pm 0.001$ | $9 \pm 3$    | $5 \pm 2$                     |

<sup>a</sup>  $S_0^2$  was fitted to be 0.73.  $k = 30\text{--}130 \text{nm}^{-1}$ ,  $R = 0.10\text{--}0.20 \text{nm}$ ,  $R_f = 2.1\%$ . <sup>b</sup>  $S_0^2$  was fixed to be 0.73.  $k = 30\text{--}130 \text{nm}^{-1}$ ,  $R = 0.10\text{--}0.20 \text{nm}$ ,  $R_f = 1.1\%$ . <sup>c</sup>  $S_0^2$  was fixed to be 0.73.  $k = 30\text{--}130 \text{nm}^{-1}$ ,  $R = 0.10\text{--}0.20 \text{nm}$ ,  $R_f = 2.2\%$ . <sup>d</sup>  $S_0^2$  was fixed to be 0.92.  $k = 30\text{--}120 \text{nm}^{-1}$ ,  $R = 0.10\text{--}0.20 \text{nm}$ ,  $R_f = 1.6\%$ .

**Table S5.** Structural Parameters Obtained by Curve-fitting Analysis of Zn K-edge EXAFS Measured at 20 K

| Shell                                  | CN            | $R / \text{nm}$   | $\Delta E_0$ | $\sigma^2 / 10^5 \text{nm}^2$ |
|----------------------------------------|---------------|-------------------|--------------|-------------------------------|
| <b>1-Ru<sub>12</sub>Zn<sup>a</sup></b> |               |                   |              |                               |
| Zn-N (porphyrin)                       | 4             | $0.207 \pm 0.002$ | $3 \pm 3$    | $4 \pm 2$                     |
| <b>B-Ru<sub>12</sub>Zn<sup>b</sup></b> |               |                   |              |                               |
| Zn-N (porphyrin, Py)                   | $5.2 \pm 1.1$ | $0.207 \pm 0.001$ | $2 \pm 2$    | $6 \pm 2$                     |
| <b>C-RuZn<sup>c</sup></b>              |               |                   |              |                               |
| Zn-N (porphyrin, Py)                   | $4.9 \pm 0.6$ | $0.205 \pm 0.001$ | $3 \pm 2$    | $6 \pm 1$                     |
| <b>D-RuZn<sup>d</sup></b>              |               |                   |              |                               |
| Zn-O                                   | $3.2 \pm 1.4$ | $0.195 \pm 0.004$ | $7 \pm 5$    | $10 \pm 6$                    |

<sup>a</sup>  $S_0^2$  was fitted to be 0.82.  $k = 30\text{--}130 \text{nm}^{-1}$ ,  $R = 0.10\text{--}0.20 \text{nm}$ ,  $R_f = 2.4\%$ . <sup>b</sup>  $S_0^2$  was fixed to be 0.82.  $k = 30\text{--}130 \text{nm}^{-1}$ ,  $R = 0.10\text{--}0.20 \text{nm}$ ,  $R_f = 1.5\%$ . <sup>c</sup>  $S_0^2$  was fixed to be 0.82.  $k = 30\text{--}130 \text{nm}^{-1}$ ,  $R = 0.10\text{--}0.20 \text{nm}$ ,  $R_f = 1.4\%$ . <sup>d</sup>  $S_0^2$  was fixed to be 0.92.  $k = 30\text{--}105 \text{nm}^{-1}$ ,  $R = 0.10\text{--}0.20 \text{nm}$ ,  $R_f = 2.0\%$ .

**Table S6.** Curve-fitting Analysis of Ru 3p<sub>3/2</sub> XPS Spectra

| Sample        | Binding energy / eV <sup>a</sup> |
|---------------|----------------------------------|
| <b>D-RuCu</b> | 462.2                            |
| <b>D-RuNi</b> | 461.5                            |
| <b>D-Ru</b>   | 461.3                            |
| Ru powder     | 461.1                            |

<sup>a</sup> Each value of binding energy was calibrated using the Si 2p peak.

## References

1. J. A. Baumann, D. J. Salmon, S. T. Wilson, T. J. Meyer, W. E. Hatfield, *Inorg. Chem.* 1978, **17**, 3342.
2. N. M. Barbosa Neto, L. De Boni, C. R. Mendonça, L. Misoguti, S. L. Queiroz, L. R. Dinelli, A. A. Batista, S. C. Zilio, *J. Phys. Chem. B* 2005, **109**, 17340.
3. F. J. Pavinatto, A. F. Gameiro Jr., A. A. Hidalgo, L. R. Dinelli, L. L. Romualdo, A. A. Batista, N. M. Barbosa Neto, M. Ferreira, O. N. Oliveira Jr., *Appl. Surf. Sci.* 2008, **254**, 5946.
4. L. R. Dinelli, G. Von Poelhsitz, E. E. Castellano, J. Ellena, S. E. Galembeck, A. A. Batista, *Inorg. Chem.* 2009, **48**, 4692.
5. O. N. Suvorova, G. A. Domrachev, E. A. Shchupak, G. S. Kudryavtseva, A. I. Kirillov, A. A. Zaitsev, *Russ. Chem. Bull., Int. Ed.* 2009, **58**, 2233.
6. S. Dovidauskas, K. Araki, H. E. Toma, *J. Porphyrin. Phthalocyanin.* 2000, **4**, 727.
7. W. Zhang, L. Xing, H. Wang, X. Liu, Y. Feng, C. Gao, *Langmuir* 2015, **31**, 4330.
8. S. Muratsugu, M. H. Lim, T. Itoh, W. Thumrongpatanaraks, M. Kondo, S. Masaoka, T. S. A. Hor, M. Tada, *Dalton Trans.* 2013, **42**, 12611.
9. (a) S. Muratsugu, M. Tada, *Acc. Chem. Res.* 2013, **46**, 300. (b) S. Muratsugu, Z. Weng, M. Tada, *ACS Catal.* 2013, **3**, 2020.
10. (a) B. Ravel, M. Newville, *J. Synchrotron Rad.* 2005, **12**, 537. (b) M. Newville, B. Ravel, D. Haskel, J. J. Rehr, E. A. Stern, Y. Yacoby, *Physica B* 1995, **208-209**, 154.
11. J. A. Bearden, A. F. Burr, *Rev. Mod. Phys.* 1967, **39**, 125.
12. (a) M. Newville, *J. Synchrotron Rad.* 2001, **8**, 322. (b) M. Newville, P. Liviņš, Y. Yacoby, J. J. Rehr, E. A. Stern, *Phys. Rev. B* 1993, **47**, 14126.
13. A. L. Ankudinov, B. Ravel, J. J. Rehr, S. D. Conradson, *Phys. Rev. B* 1998, **58**, 7565.
14. J. C. Goeltz, E. E. Benson, C. P. Kubiak, *J. Phys. Chem. B* 2010, **114**, 14729.
15. H.-S. He, *Acta Crystallogr. Sect. E: Struct. Rep. Online* 2007, **63**, m976.
16. D. L. Cullen, E. F. Meyer Jr., *J. Am. Chem. Soc.* 1974, **96**, 2095.
17. M. N. Alberti, S. Nowakowska, M. D. Tzirakis, J. Nowakowski, P. Fesser, W. B. Schweizer, A. Shchyrba, C. Thilgen, T. A. Jung, F. Diederich, *Eur. J. Org. Chem.* 2014, **26**, 5705.
